# Supplementary material for: Prediction of Detailed Enzyme Functions and Identification of Specificity Determining Residues by Random Forests
Source: PLoS One. 2014 Jan 8;9(1):e84623. doi: 10.1371/journal.pone.0084623 (PMC3885575; doi:10.1371/journal.pone.0084623)
Supplement: Table S4 — List of the rf-SDRs. (XLSX) [file pone.0084623.s007.xlsx]

## Sheet: TableS4
Table S4. List of the rf-SDRs.
CATH homologous superfamily	EC number	Representative domain	Reisue number	Amino acid	Classification
1.10.8.10	2.7.11.1	3fe3B03	361	TYR	CSR
1.10.8.10	2.7.11.1	3fe3B03	364	LEU	CSR
1.10.8.10	3.1.2.15	1wivA00	40	GLY	CSR
1.10.8.10	3.1.2.15	1wivA00	58	GLU	CSR
1.10.8.10	3.1.2.15	1wivA00	60	ALA	CSR
1.10.8.50	5.99.1.3	2hkjA02	258	LEU	CSR
1.10.8.50	5.99.1.3	2hkjA02	262	PHE	CSR
1.10.8.60	2.7.7.7	1jqjD03	149	ARG	CSR
1.10.8.60	2.7.7.7	1jqjD03	150	TRP	CSR
1.10.8.60	2.7.7.7	1jqjD03	156	LYS	CSR
1.10.8.60	2.7.7.7	1jqjD03	158	LEU	CSR
1.10.8.60	2.7.7.7	1jqjD03	178	LEU	LBR
1.10.8.60	2.7.7.7	1jqjD03	185	LEU	CSR
1.10.8.60	2.7.7.7	1jqjD03	218	VAL	CSR
1.10.8.60	3.4.21.53	1qzmA00	535	TYR	CSR
1.10.8.60	3.4.21.53	1qzmA00	540	GLY	CSR
1.10.8.60	3.4.21.53	1qzmA00	553	ARG	CSR
1.10.8.60	3.4.21.53	1qzmA00	554	LYS	CSR
1.10.8.60	3.6.4.6	1nsfA02	670	ILE	CSR
1.10.8.60	3.6.4.6	1nsfA02	672	THR	CSR
1.10.8.60	3.6.4.6	1nsfA02	694	ILE	CSR
1.10.8.60	3.6.4.6	1nsfA02	707	ILE	LBR
1.10.8.60	3.6.4.6	1nsfA02	708	LYS	ASR
1.10.8.60	4.1.3.39	1nvmE02	286	GLY	CSR
1.10.8.60	4.1.3.39	1nvmE02	291	TYR	ASR
1.10.8.60	4.1.3.39	1nvmE02	294	PHE	CSR
1.10.8.60	4.1.3.39	1nvmE02	325	GLN	CSR
1.10.10.10	2.1.1.63	1wrjA02	91	TYR	ASR
1.10.10.10	2.1.1.63	1wrjA02	112	ASN	ASR
1.10.10.10	2.1.1.63	1wrjA02	119	PRO	LBR
1.10.10.10	2.1.1.63	1wrjA02	120	CYS	ASR
1.10.10.10	2.1.1.63	1wrjA02	121	HIS	ASR
1.10.10.10	2.1.1.63	1wrjA02	139	LYS	CSR
1.10.10.10	2.1.1.63	1wrjA02	146	GLU	ASR
1.10.10.10	2.1.1.68	1kyzA01	18	GLU	CSR
1.10.10.10	2.1.1.68	1kyzA01	28	SER	CSR
1.10.10.10	2.1.1.68	1kyzA01	42	LEU	CSR
1.10.10.10	2.1.1.68	1kyzA01	111	VAL	CSR
1.10.10.10	2.7.1.161	3ctaA01	40	GLN	CSR
1.10.10.10	2.7.1.161	3ctaA01	72	GLY	CSR
1.10.10.10	2.7.1.161	3ctaA01	76	LEU	CSR
1.10.10.10	3.4.11.18	3fmrB02	291	LEU	CSR
1.10.10.10	3.4.11.18	3fmrB02	293	PHE	CSR
1.10.10.10	3.4.11.18	3fmrB02	296	ARG	CSR
1.10.10.10	3.4.21.88	1jhhA02	8	GLN	CSR
1.10.10.10	3.4.21.88	1jhhA02	23	GLY	CSR
1.10.10.10	3.4.21.88	1jhhA02	26	PRO	CSR
1.10.10.10	3.4.21.88	1jhhA02	64	ARG	CSR
1.10.10.10	5.99.1.3	2zbkG01	105	TYR	CSR
1.10.10.10	5.99.1.3	2zbkG01	106	TYR	ASR
1.10.10.10	5.99.1.3	2zbkG01	132	GLN	CSR
1.10.10.10	5.99.1.3	2zbkG01	141	ASP	CSR
1.10.10.10	5.99.1.3	2zbkG01	150	ARG	CSR
1.10.10.10	5.99.1.3	2zbkG01	151	GLU	CSR
1.10.10.60	2.7.7.6	2pmzY00	7	CYS	CSR
1.10.10.60	2.7.7.6	2pmzY00	11	GLY	CSR
1.10.10.60	2.7.7.6	2pmzY00	45	CYS	CSR
1.10.10.60	6.4.1.1	3bg9D04	1014	PRO	CSR
1.10.10.60	6.4.1.1	3bg9D04	1016	VAL	CSR
1.10.10.200	3.1.26.13	1wjcB00	12	HIS	LBR
1.10.10.200	3.1.26.13	1wjcB00	32	VAL	CSR
1.10.10.200	3.1.26.13	1wjcB00	33	ALA	CSR
1.10.10.200	3.1.26.13	1wjcB00	36	ILE	CSR
1.10.10.200	3.4.23.16	1wjcB00	12	HIS	CSR
1.10.10.200	3.4.23.16	1wjcB00	16	HIS	CSR
1.10.10.200	3.4.23.16	1wjcB00	32	VAL	CSR
1.10.10.200	3.4.23.16	1wjcB00	36	ILE	CSR
1.10.10.350	6.1.1.6	1irxB05	487	PHE	CSR
1.10.10.350	6.1.1.6	1irxB05	491	TYR	CSR
1.10.10.350	6.1.1.6	1irxB05	502	ARG	CSR
1.10.10.350	6.1.1.6	1irxB05	506	PHE	CSR
1.10.10.350	6.1.1.17	2dxiB05	435	ARG	CSR
1.10.10.350	6.1.1.17	2dxiB05	437	ALA	CSR
1.10.10.350	6.1.1.17	2dxiB05	445	PRO	CSR
1.10.40.30	4.2.1.2	1vdkA03	418	TYR	CSR
1.10.40.30	4.2.1.2	1vdkA03	425	VAL	CSR
1.10.40.30	4.2.1.2	1vdkA03	428	ALA	CSR
1.10.40.30	4.2.1.2	1vdkA03	435	LEU	CSR
1.10.40.30	4.3.2.1	1tjwD03	386	PHE	CSR
1.10.40.30	4.3.2.1	1tjwD03	387	ARG	CSR
1.10.40.30	4.3.2.1	1tjwD03	389	ALA	CSR
1.10.40.30	4.3.2.1	1tjwD03	390	HIS	CSR
1.10.40.30	4.3.2.1	1tjwD03	397	VAL	CSR
1.10.40.30	4.3.2.2	1c3uB03	367	THR	CSR
1.10.40.30	4.3.2.2	1c3uB03	372	TYR	CSR
1.10.40.30	4.3.2.2	1c3uB03	379	ALA	CSR
1.10.40.30	4.3.2.2	1c3uB03	417	TYR	CSR
1.10.135.10	2.7.3.2	1qh4D01	59	THR	CSR
1.10.135.10	2.7.3.2	1qh4D01	66	HIS	CSR
1.10.135.10	2.7.3.2	1qh4D01	69	ILE	LBR
1.10.135.10	2.7.3.2	1qh4D01	71	THR	LBR
1.10.135.10	2.7.3.2	1qh4D01	75	VAL	CSR
1.10.135.10	2.7.3.3	1sd0A01	25	SER	CSR
1.10.135.10	2.7.3.3	1sd0A01	26	LEU	CSR
1.10.135.10	2.7.3.3	1sd0A01	63	SER	LBR
1.10.135.10	2.7.3.3	1sd0A01	64	GLY	LBR
1.10.135.10	2.7.3.3	1sd0A01	68	TYR	LBR
1.10.150.20	2.7.7.6	1aroP05	571	TYR	LBR
1.10.150.20	2.7.7.6	1aroP05	627	ARG	ASR
1.10.150.20	2.7.7.6	1aroP05	635	MET	LBR
1.10.150.20	2.7.7.6	1aroP05	636	THR	LBR
1.10.150.20	2.7.7.6	1aroP05	639	TYR	LBR
1.10.150.20	2.7.7.6	1aroP05	642	LYS	CSR
1.10.150.20	2.7.7.6	1aroP05	645	GLY	CSR
1.10.150.20	2.7.7.6	1aroP05	658	ALA	CSR
1.10.150.20	2.7.7.6	1aroP05	684	SER	CSR
1.10.150.20	2.7.7.6	1aroP05	746	ARG	LBR
1.10.150.20	2.7.7.6	1aroP05	756	ARG	LBR
1.10.150.20	2.7.7.6	1aroP05	784	HIS	LBR
1.10.150.20	2.7.7.7	4bdpA04	657	ILE	LBR
1.10.150.20	2.7.7.7	4bdpA04	658	GLU	LBR
1.10.150.20	2.7.7.7	4bdpA04	682	HIS	ASR
1.10.150.20	2.7.7.7	4bdpA04	699	PRO	CSR
1.10.150.20	2.7.7.7	4bdpA04	702	ARG	ASR
1.10.150.20	2.7.7.7	4bdpA04	706	LYS	ASR
1.10.150.20	2.7.7.7	4bdpA04	767	LEU	LBR
1.10.150.20	2.7.7.7	4bdpA04	768	HIS	LBR
1.10.150.20	2.7.7.7	4bdpA04	772	TYR	LBR
1.10.150.20	6.5.1.2	1dgsB06	2506	LEU	CSR
1.10.150.20	6.5.1.2	1dgsB06	2511	GLY	CSR
1.10.150.20	6.5.1.2	1dgsB06	2516	GLY	CSR
1.10.150.20	6.5.1.2	1dgsB06	2571	LEU	CSR
1.10.150.50	2.7.10.1	1f0mA00	30	PHE	CSR
1.10.150.50	2.7.10.1	1f0mA00	48	ASP	CSR
1.10.150.50	2.7.10.1	1f0mA00	63	ILE	CSR
1.10.150.120	1.17.1.4	3eubS02	102	GLN	CSR
1.10.150.120	1.17.1.4	3eubS02	117	THR	CSR
1.10.150.120	1.17.1.4	3eubS02	145	GLY	CSR
1.10.150.240	3.1.3.18	2hszA02	47	ILE	CSR
1.10.150.240	3.1.3.18	2hszA02	48	GLY	CSR
1.10.150.240	3.1.3.18	2hszA02	50	GLY	CSR
1.10.238.10	2.7.11.1	1s6iA02	126	ASP	CSR
1.10.238.10	2.7.11.1	1s6iA02	128	ASP	CSR
1.10.238.10	3.1.4.11	2isdB02	236	PHE	CSR
1.10.238.10	3.1.4.11	2isdB02	237	LEU	CSR
1.10.238.10	3.1.4.11	2isdB02	255	ILE	CSR
1.10.240.10	6.1.1.1	2cyaA02	237	VAL	ASR
1.10.240.10	6.1.1.1	2cyaA02	238	LYS	LBR
1.10.240.10	6.1.1.1	2cyaA02	239	MET	LBR
1.10.240.10	6.1.1.1	2cyaA02	240	SER	LBR
1.10.240.10	6.1.1.1	2cyaA02	241	LYS	LBR
1.10.240.10	6.1.1.1	2cyaA02	273	GLY	CSR
1.10.240.10	6.1.1.1	2cyaA02	324	LEU	LBR
1.10.240.10	6.1.1.2	1r6uB02	361	LEU	CSR
1.10.240.10	6.1.1.2	1r6uB02	376	ALA	CSR
1.10.240.10	6.1.1.2	1r6uB02	378	SER	CSR
1.10.240.10	6.1.1.2	1r6uB02	379	GLY	CSR
1.10.240.10	6.1.1.2	1r6uB02	442	ILE	CSR
1.10.275.10	4.2.1.2	1vdkB01	24	GLN	CSR
1.10.275.10	4.2.1.2	1vdkB01	60	ASN	CSR
1.10.275.10	4.2.1.2	1vdkB01	99	SER	CSR
1.10.275.10	4.2.1.2	1vdkB01	104	ASN	CSR
1.10.275.10	4.2.1.2	1vdkB01	131	ASN	LBR
1.10.275.10	4.2.1.2	1vdkB01	132	ASP	LBR
1.10.275.10	4.3.1.3	1gkmA01	57	THR	CSR
1.10.275.10	4.3.1.3	1gkmA01	76	GLN	CSR
1.10.275.10	4.3.1.3	1gkmA01	88	GLY	CSR
1.10.275.10	4.3.1.3	1gkmA01	141	GLY	CSR
1.10.275.10	4.3.1.3	1gkmA01	145	ASP	CSR
1.10.275.10	4.3.1.3	1gkmA01	146	LEU	CSR
1.10.275.10	4.3.1.3	1gkmA01	149	LEU	CSR
1.10.275.10	4.3.1.3	1gkmA01	151	HIS	CSR
1.10.275.10	4.3.1.3	1gkmA01	185	LEU	CSR
1.10.275.10	4.3.1.3	1gkmA01	195	ASN	CSR
1.10.275.10	4.3.1.3	1gkmA01	196	GLY	ASR
1.10.275.10	4.3.1.24	1y2mD01	64	GLY	CSR
1.10.275.10	4.3.1.24	1y2mD01	124	THR	CSR
1.10.275.10	4.3.1.24	1y2mD01	166	ARG	CSR
1.10.275.10	4.3.1.24	1y2mD01	168	ALA	CSR
1.10.275.10	4.3.1.24	1y2mD01	206	ARG	CSR
1.10.275.10	4.3.1.24	1y2mD01	217	PRO	CSR
1.10.275.10	4.3.1.24	1y2mD01	220	TYR	CSR
1.10.275.10	4.3.1.24	1y2mD01	263	LYS	CSR
1.10.275.10	4.3.1.24	1y2mD01	264	GLU	CSR
1.10.275.10	4.3.1.24	1y2mD01	270	ASN	CSR
1.10.275.10	4.3.2.1	1tjwD01	51	LEU	CSR
1.10.275.10	4.3.2.1	1tjwD01	88	GLU	CSR
1.10.275.10	4.3.2.1	1tjwD01	91	HIS	LBR
1.10.275.10	4.3.2.1	1tjwD01	95	GLU	CSR
1.10.275.10	4.3.2.1	1tjwD01	103	GLY	CSR
1.10.275.10	4.3.2.1	1tjwD01	114	SER	LBR
1.10.275.10	4.3.2.1	1tjwD01	115	ARG	LBR
1.10.275.10	4.3.2.1	1tjwD01	116	ASN	LBR
1.10.275.10	4.3.2.1	1tjwD01	119	VAL	LBR
1.10.275.10	4.3.2.1	1tjwD01	205	ALA	LBR
1.10.275.10	4.3.2.2	2ptrB01	40	GLU	CSR
1.10.275.10	4.3.2.2	2ptrB01	86	GLU	CSR
1.10.275.10	4.3.2.2	2ptrB01	91	HIS	ASR
1.10.275.10	4.3.2.2	2ptrB01	92	ASP	CSR
1.10.275.10	4.3.2.2	2ptrB01	95	ALA	CSR
1.10.287.10	6.1.1.15	1fyjA00	12	GLN	CSR
1.10.287.10	6.1.1.15	1fyjA00	39	LEU	CSR
1.10.287.10	6.1.1.15	1fyjA00	43	TYR	CSR
1.10.287.10	6.1.1.17	1fyjA00	26	LYS	CSR
1.10.287.10	6.1.1.17	1fyjA00	36	LEU	CSR
1.10.287.10	6.1.1.17	1fyjA00	40	LYS	CSR
1.10.287.10	6.1.1.17	1fyjA00	44	LYS	CSR
1.10.340.30	4.2.99.18	1xg7B02	26	GLN	LBR
1.10.340.30	4.2.99.18	1xg7B02	49	ASN	CSR
1.10.340.30	4.2.99.18	1xg7B02	91	LYS	CSR
1.10.340.30	4.2.99.18	1xg7B02	95	ARG	CSR
1.10.340.30	4.2.99.18	1xg7B02	126	MET	CSR
1.10.340.30	4.2.99.18	1xg7B02	129	LEU	CSR
1.10.340.30	4.2.99.18	1xg7B02	144	LYS	LBR
1.10.340.30	4.2.99.18	1xg7B02	148	PHE	LBR
1.10.340.30	4.2.99.18	1xg7B02	151	LYS	ASR
1.10.405.10	1.4.3.2	2iidD03	184	SER	CSR
1.10.405.10	1.4.3.2	2iidD03	185	THR	CSR
1.10.405.10	1.4.3.2	2iidD03	208	ASN	LBR
1.10.405.10	1.4.3.2	2iidD03	219	GLU	CSR
1.10.405.10	1.4.3.2	2iidD03	227	PHE	CSR
1.10.420.10	1.11.1.5	3e2oA02	158	PHE	LBR
1.10.420.10	1.11.1.5	3e2oA02	174	ALA	LBR
1.10.420.10	1.11.1.5	3e2oA02	179	LYS	LBR
1.10.420.10	1.11.1.5	3e2oA02	181	HIS	LBR
1.10.420.10	1.11.1.5	3e2oA02	184	ARG	LBR
1.10.420.10	1.11.1.5	3e2oA02	193	ALA	LBR
1.10.420.10	1.11.1.5	3e2oA02	194	ALA	LBR
1.10.420.10	1.11.1.5	3e2oA02	230	MET	CSR
1.10.420.10	1.11.1.5	3e2oA02	259	PHE	CSR
1.10.420.10	1.11.1.6	1itkB02	250	GLU	CSR
1.10.420.10	1.11.1.6	1itkB02	254	LEU	CSR
1.10.420.10	1.11.1.6	1itkB02	257	GLY	CSR
1.10.420.10	1.11.1.6	1itkB02	312	THR	CSR
1.10.420.10	1.11.1.6	1itkB02	375	LEU	CSR
1.10.420.10	1.11.1.7	1gwuA02	140	GLY	LBR
1.10.420.10	1.11.1.7	1gwuA02	141	PRO	LBR
1.10.420.10	1.11.1.7	1gwuA02	142	PHE	LBR
1.10.420.10	1.11.1.7	1gwuA02	161	SER	CSR
1.10.420.10	1.11.1.7	1gwuA02	165	ALA	CSR
1.10.420.10	1.11.1.7	1gwuA02	178	ARG	LBR
1.10.420.10	1.11.1.7	1gwuA02	179	PHE	LBR
1.10.420.10	1.11.1.11	2vo2X02	132	PRO	LBR
1.10.420.10	1.11.1.11	2vo2X02	133	ASP	LBR
1.10.420.10	1.11.1.11	2vo2X02	134	ALA	LBR
1.10.420.10	1.11.1.11	2vo2X02	145	PHE	LBR
1.10.420.10	1.11.1.11	2vo2X02	164	THR	ASR
1.10.420.10	1.11.1.11	2vo2X02	172	ARG	ASR
1.10.420.10	1.11.1.11	2vo2X02	179	TRP	ASR
1.10.420.10	1.11.1.11	2vo2X02	187	ASP	ASR
1.10.420.10	1.11.1.14	1llpA02	146	GLU	LBR
1.10.420.10	1.11.1.14	1llpA02	147	PRO	LBR
1.10.420.10	1.11.1.14	1llpA02	171	TRP	ASR
1.10.420.10	1.11.1.14	1llpA02	172	MET	LBR
1.10.420.10	1.11.1.14	1llpA02	173	LEU	LBR
1.10.420.10	1.11.1.14	1llpA02	177	SER	ASR
1.10.420.10	1.11.1.14	1llpA02	179	ALA	LBR
1.10.420.10	1.11.1.14	1llpA02	180	ALA	LBR
1.10.420.10	1.11.1.14	1llpA02	183	ASP	LBR
1.10.420.10	1.11.1.14	1llpA02	249	CYS	CSR
1.10.510.10	2.7.10.1	1p4oB02	1051	LEU	LBR
1.10.510.10	2.7.10.1	1p4oB02	1052	MET	LBR
1.10.510.10	2.7.10.1	1p4oB02	1109	ARG	ASR
1.10.510.10	2.7.10.1	1p4oB02	1131	TYR	ASR
1.10.510.10	2.7.10.1	1p4oB02	1136	TYR	ASR
1.10.510.10	2.7.10.1	1p4oB02	1142	GLY	LBR
1.10.510.10	2.7.10.1	1p4oB02	1143	LEU	LBR
1.10.510.10	2.7.10.1	1p4oB02	1144	LEU	LBR
1.10.510.10	2.7.10.1	1p4oB02	1145	PRO	LBR
1.10.510.10	2.7.10.1	1p4oB02	1146	VAL	LBR
1.10.510.10	2.7.10.2	3e64A02	932	LEU	LBR
1.10.510.10	2.7.10.2	3e64A02	936	SER	LBR
1.10.510.10	2.7.10.2	3e64A02	963	GLY	CSR
1.10.510.10	2.7.10.2	3e64A02	980	ARG	ASR
1.10.510.10	2.7.10.2	3e64A02	1006	GLU	ASR
1.10.510.10	2.7.10.2	3e64A02	1091	PRO	CSR
1.10.510.10	2.7.11.1	3begA02	168	LEU	LBR
1.10.510.10	2.7.11.1	3begA02	171	HIS	LBR
1.10.510.10	2.7.11.1	3begA02	204	HIS	CSR
1.10.510.10	2.7.11.1	3begA02	215	LYS	LBR
1.10.510.10	2.7.11.1	3begA02	217	GLU	LBR
1.10.510.10	2.7.11.1	3begA02	497	ASP	LBR
1.10.510.10	2.7.11.1	3begA02	500	ASN	LBR
1.10.510.10	2.7.11.1	3begA02	501	ALA	LBR
1.10.510.10	2.7.11.11	1rdqE01	173	LEU	LBR
1.10.510.10	2.7.11.11	1rdqE01	183	THR	LBR
1.10.510.10	2.7.11.11	1rdqE01	231	MET	CSR
1.10.510.10	2.7.11.11	1rdqE01	247	TYR	CSR
1.10.510.10	2.7.11.11	1rdqE01	282	GLY	CSR
1.10.510.10	2.7.11.11	1rdqE01	287	GLY	CSR
1.10.510.10	2.7.11.11	1rdqE01	302	TRP	CSR
1.10.510.10	2.7.11.13	1xjdA02	492	LEU	CSR
1.10.510.10	2.7.11.13	1xjdA02	541	GLY	CSR
1.10.510.10	2.7.11.13	1xjdA02	542	THR	CSR
1.10.510.10	2.7.11.13	1xjdA02	578	PRO	CSR
1.10.510.10	2.7.11.13	1xjdA02	591	ILE	CSR
1.10.510.10	2.7.11.13	1xjdA02	599	PRO	CSR
1.10.510.10	2.7.11.16	2acxB03	309	TYR	CSR
1.10.510.10	2.7.11.16	2acxB03	330	LEU	CSR
1.10.510.10	2.7.11.16	2acxB03	373	CYS	CSR
1.10.510.10	2.7.11.16	2acxB03	395	GLU	CSR
1.10.510.10	2.7.11.16	2acxB03	433	GLY	CSR
1.10.510.10	2.7.11.17	2v7oA02	139	PRO	CSR
1.10.510.10	2.7.11.17	2v7oA02	213	PRO	CSR
1.10.510.10	2.7.11.17	2v7oA02	214	PHE	CSR
1.10.510.10	2.7.11.17	2v7oA02	246	LYS	CSR
1.10.510.10	2.7.11.17	2v7oA02	271	TRP	CSR
1.10.510.10	2.7.11.21	2rkuA02	213	GLY	CSR
1.10.510.10	2.7.11.21	2rkuA02	214	THR	CSR
1.10.510.10	2.7.11.21	2rkuA02	228	HIS	CSR
1.10.510.10	2.7.11.21	2rkuA02	242	TYR	CSR
1.10.510.10	2.7.11.21	2rkuA02	249	PRO	CSR
1.10.510.10	2.7.11.21	2rkuA02	250	PRO	CSR
1.10.510.10	2.7.11.21	2rkuA02	286	LEU	CSR
1.10.510.10	2.7.11.22	2r3iA02	85	GLN	LBR
1.10.510.10	2.7.11.22	2r3iA02	86	ASP	LBR
1.10.510.10	2.7.11.22	2r3iA02	89	LYS	LBR
1.10.510.10	2.7.11.22	2r3iA02	131	GLN	LBR
1.10.510.10	2.7.11.22	2r3iA02	144	ALA	LBR
1.10.510.10	2.7.11.22	2r3iA02	169	ARG	CSR
1.10.510.10	2.7.11.22	2r3iA02	180	TYR	CSR
1.10.510.10	2.7.11.22	2r3iA02	195	GLU	CSR
1.10.510.10	2.7.11.23	3blhA02	141	HIS	CSR
1.10.510.10	2.7.11.23	3blhA02	151	LYS	CSR
1.10.510.10	2.7.11.23	3blhA02	172	ARG	CSR
1.10.510.10	2.7.11.23	3blhA02	193	TRP	CSR
1.10.510.10	2.7.11.23	3blhA02	195	ARG	CSR
1.10.510.10	2.7.11.23	3blhA02	206	TYR	CSR
1.10.510.10	2.7.11.23	3blhA02	213	TRP	CSR
1.10.510.10	2.7.11.23	3blhA02	221	GLU	CSR
1.10.510.10	2.7.11.23	3blhA02	303	ARG	CSR
1.10.510.10	2.7.11.24	2fa2B02	96	MET	LBR
1.10.510.10	2.7.11.24	2fa2B02	99	ASP	LBR
1.10.510.10	2.7.11.24	2fa2B02	102	ARG	LBR
1.10.510.10	2.7.11.24	2fa2B02	141	SER	LBR
1.10.510.10	2.7.11.24	2fa2B02	189	ARG	CSR
1.10.510.10	2.7.11.24	2fa2B02	211	CYS	CSR
1.10.510.10	2.7.11.24	2fa2B02	212	ILE	CSR
1.10.510.10	2.7.11.24	2fa2B02	231	GLN	CSR
1.10.510.10	2.7.11.25	2evaA02	145	HIS	CSR
1.10.510.10	2.7.11.25	2evaA02	176	PHE	CSR
1.10.510.10	2.7.11.25	2evaA02	177	GLY	CSR
1.10.510.10	2.7.11.25	2evaA02	196	MET	CSR
1.10.510.10	2.7.11.25	2evaA02	214	SER	CSR
1.10.510.10	2.7.11.25	2evaA02	228	PRO	CSR
1.10.510.10	2.7.11.30	1iasB02	336	SER	CSR
1.10.510.10	2.7.11.30	1iasB02	377	ARG	CSR
1.10.510.10	2.7.11.30	1iasB02	378	TYR	CSR
1.10.510.10	2.7.11.30	1iasB02	384	LEU	CSR
1.10.510.10	2.7.11.30	1iasB02	406	LEU	CSR
1.10.510.10	2.7.11.30	1iasB02	436	PRO	CSR
1.10.510.10	2.7.11.30	1iasB02	452	PRO	CSR
1.10.510.10	2.7.11.30	1iasB02	475	TRP	CSR
1.10.510.10	2.7.12.1	2eu9A02	285	LYS	CSR
1.10.510.10	2.7.12.1	2eu9A02	290	LEU	CSR
1.10.510.10	2.7.12.1	2eu9A02	320	ASP	CSR
1.10.510.10	2.7.12.1	2eu9A02	322	GLY	CSR
1.10.510.10	2.7.12.1	2eu9A02	361	GLY	CSR
1.10.510.10	2.7.12.1	2eu9A02	460	ARG	CSR
1.10.510.10	2.7.12.2	1s9iA02	154	SER	LBR
1.10.510.10	2.7.12.2	1s9iA02	157	GLN	LBR
1.10.510.10	2.7.12.2	1s9iA02	196	LYS	LBR
1.10.510.10	2.7.12.2	1s9iA02	198	SER	LBR
1.10.510.10	2.7.12.2	1s9iA02	201	LEU	LBR
1.10.510.10	2.7.12.2	1s9iA02	209	LYS	CSR
1.10.510.10	2.7.12.2	1s9iA02	266	PRO	CSR
1.10.520.10	1.11.1.5	3e2oA01	27	ALA	CSR
1.10.520.10	1.11.1.5	3e2oA01	100	PRO	CSR
1.10.520.10	1.11.1.5	3e2oA01	101	TRP	CSR
1.10.520.10	1.11.1.5	3e2oA01	118	GLU	CSR
1.10.520.10	1.11.1.5	3e2oA01	143	ARG	CSR
1.10.520.10	1.11.1.5	3e2oA01	144	LEU	CSR
1.10.520.10	1.11.1.6	1u2kA01	472	TRP	CSR
1.10.520.10	1.11.1.6	1u2kA01	479	ARG	CSR
1.10.520.10	1.11.1.6	1u2kA01	482	ASP	CSR
1.10.520.10	1.11.1.6	1u2kA01	484	ARG	CSR
1.10.520.10	1.11.1.6	1u2kA01	485	GLY	CSR
1.10.520.10	1.11.1.6	1u2kA01	486	GLY	CSR
1.10.520.10	1.11.1.6	1u2kA01	496	PRO	CSR
1.10.520.10	1.11.1.6	1u2kA01	500	TRP	CSR
1.10.520.10	1.11.1.7	1c8iA01	24	CYS	LBR
1.10.520.10	1.11.1.7	1c8iA01	45	SER	LBR
1.10.520.10	1.11.1.7	1c8iA01	55	PHE	LBR
1.10.520.10	1.11.1.7	1c8iA01	56	HIS	ASR
1.10.520.10	1.11.1.7	1c8iA01	58	ALA	CSR
1.10.520.10	1.11.1.7	1c8iA01	86	ILE	LBR
1.10.520.10	1.11.1.7	1c8iA01	91	PRO	LBR
1.10.520.10	1.11.1.7	1c8iA01	92	ALA	LBR
1.10.520.10	1.11.1.7	1c8iA01	93	ASN	ASR
1.10.520.10	1.11.1.7	1c8iA01	113	SER	CSR
1.10.520.10	1.11.1.7	1c8iA01	120	PHE	CSR
1.10.520.10	1.11.1.7	1c8iA01	291	THR	LBR
1.10.520.10	1.11.1.11	2vo2X01	30	LYS	LBR
1.10.520.10	1.11.1.11	2vo2X01	32	CYS	ASR
1.10.520.10	1.11.1.11	2vo2X01	34	PRO	LBR
1.10.520.10	1.11.1.11	2vo2X01	35	LEU	LBR
1.10.520.10	1.11.1.11	2vo2X01	39	LEU	CSR
1.10.520.10	1.11.1.11	2vo2X01	41	ALA	ASR
1.10.520.10	1.11.1.11	2vo2X01	42	HIS	ASR
1.10.520.10	1.11.1.11	2vo2X01	46	THR	CSR
1.10.520.10	1.11.1.11	2vo2X01	55	GLY	CSR
1.10.520.10	1.11.1.11	2vo2X01	58	GLY	CSR
1.10.520.10	1.11.1.11	2vo2X01	65	GLU	CSR
1.10.520.10	1.11.1.11	2vo2X01	110	GLY	CSR
1.10.520.10	1.11.1.14	1lgaB01	12	ALA	CSR
1.10.520.10	1.11.1.14	1lgaB01	25	GLN	CSR
1.10.520.10	1.11.1.14	1lgaB01	27	ASN	CSR
1.10.520.10	1.11.1.14	1lgaB01	39	HIS	LBR
1.10.520.10	1.11.1.14	1lgaB01	54	PRO	CSR
1.10.520.10	1.11.1.14	1lgaB01	85	ILE	CSR
1.10.520.10	1.11.1.14	1lgaB01	89	GLU	CSR
1.10.520.10	1.11.1.14	1lgaB01	123	ALA	CSR
1.10.530.10	3.2.1.14	2baaA01	23	CYS	CSR
1.10.530.10	3.2.1.14	2baaA01	28	PHE	CSR
1.10.530.10	3.2.1.14	2baaA01	29	TYR	CSR
1.10.530.10	3.2.1.14	2baaA01	37	ALA	CSR
1.10.530.10	3.2.1.14	2baaA01	58	ALA	CSR
1.10.530.10	3.2.1.14	2baaA01	59	ALA	CSR
1.10.530.10	3.2.1.14	2baaA01	68	THR	CSR
1.10.530.10	3.2.1.14	2baaA01	154	ALA	CSR
1.10.530.10	3.2.1.17	1lspA00	56	GLY	CSR
1.10.530.10	3.2.1.17	1lspA00	74	SER	CSR
1.10.530.10	3.2.1.17	1lspA00	90	GLY	ASR
1.10.530.10	3.2.1.17	1lspA00	95	GLN	CSR
1.10.530.10	3.2.1.17	1lspA00	97	ASP	LBR
1.10.530.10	3.2.1.17	1lspA00	100	SER	LBR
1.10.530.10	3.2.1.17	1lspA00	119	ILE	LBR
1.10.530.10	3.2.1.17	1lspA00	147	TYR	LBR
1.10.530.10	3.2.1.17	1lspA00	151	ALA	CSR
1.10.533.10	2.7.11.1	1d2zA00	55	TRP	CSR
1.10.533.10	2.7.11.1	1d2zA00	58	LEU	CSR
1.10.533.10	2.7.11.1	1d2zA00	87	LEU	CSR
1.10.533.10	2.7.11.1	1d2zA00	90	TRP	CSR
1.10.533.10	2.7.11.1	1d2zA00	105	PHE	CSR
1.10.540.10	1.3.3.6	2ddhA01	23	LEU	CSR
1.10.540.10	1.3.3.6	2ddhA01	43	ASP	CSR
1.10.540.10	1.3.3.6	2ddhA01	61	GLU	CSR
1.10.540.10	1.3.3.6	2ddhA01	106	MET	CSR
1.10.540.10	1.3.3.6	2ddhA01	107	PHE	CSR
1.10.540.10	1.3.3.6	2ddhA01	119	GLN	CSR
1.10.600.10	2.5.1.1	2qisA00	113	PHE	LBR
1.10.600.10	2.5.1.1	2qisA00	120	MET	LBR
1.10.600.10	2.5.1.1	2qisA00	126	ARG	ASR
1.10.600.10	2.5.1.1	2qisA00	127	ARG	LBR
1.10.600.10	2.5.1.1	2qisA00	185	GLN	LBR
1.10.600.10	2.5.1.1	2qisA00	188	ASP	LBR
1.10.600.10	2.5.1.1	2qisA00	214	LYS	ASR
1.10.600.10	2.5.1.1	2qisA00	215	SER	ASR
1.10.600.10	2.5.1.1	2qisA00	253	PHE	ASR
1.10.600.10	2.5.1.1	2qisA00	257	ASP	ASR
1.10.600.10	2.5.1.1	2qisA00	275	ASP	CSR
1.10.600.10	2.5.1.1	2qisA00	280	LYS	LBR
1.10.600.10	2.5.1.10	2qisA00	110	GLN	LBR
1.10.600.10	2.5.1.10	2qisA00	113	PHE	LBR
1.10.600.10	2.5.1.10	2qisA00	114	LEU	LBR
1.10.600.10	2.5.1.10	2qisA00	120	MET	LBR
1.10.600.10	2.5.1.10	2qisA00	126	ARG	ASR
1.10.600.10	2.5.1.10	2qisA00	127	ARG	LBR
1.10.600.10	2.5.1.10	2qisA00	128	GLY	CSR
1.10.600.10	2.5.1.10	2qisA00	214	LYS	ASR
1.10.600.10	2.5.1.10	2qisA00	215	SER	ASR
1.10.600.10	2.5.1.10	2qisA00	257	ASP	ASR
1.10.600.10	2.5.1.10	2qisA00	275	ASP	CSR
1.10.600.10	2.5.1.10	2qisA00	280	LYS	LBR
1.10.600.10	2.5.1.21	1ezfC00	74	LEU	CSR
1.10.600.10	2.5.1.21	1ezfC00	150	MET	CSR
1.10.600.10	2.5.1.21	1ezfC00	154	MET	CSR
1.10.600.10	2.5.1.21	1ezfC00	182	GLY	CSR
1.10.600.10	2.5.1.21	1ezfC00	230	PHE	CSR
1.10.600.10	2.5.1.21	1ezfC00	236	TRP	CSR
1.10.600.10	2.5.1.21	1ezfC00	269	HIS	CSR
1.10.600.10	2.5.1.21	1ezfC00	293	GLN	CSR
1.10.600.10	2.5.1.21	1ezfC00	296	ALA	CSR
1.10.600.10	2.5.1.21	1ezfC00	299	THR	CSR
1.10.600.10	2.5.1.21	1ezfC00	314	VAL	CSR
1.10.620.20	1.14.19.2	1oq9A00	42	SER	CSR
1.10.620.20	1.14.19.2	1oq9A00	91	PRO	CSR
1.10.620.20	1.14.19.2	1oq9A00	119	ASP	CSR
1.10.620.20	1.14.19.2	1oq9A00	136	THR	CSR
1.10.620.20	1.14.19.2	1oq9A00	142	GLU	CSR
1.10.620.20	1.14.19.2	1oq9A00	147	GLY	CSR
1.10.620.20	1.14.19.2	1oq9A00	153	TYR	CSR
1.10.620.20	1.14.19.2	1oq9A00	158	GLY	CSR
1.10.620.20	1.14.19.2	1oq9A00	171	TYR	CSR
1.10.620.20	1.14.19.2	1oq9A00	181	THR	CSR
1.10.620.20	1.14.19.2	1oq9A00	199	THR	ASR
1.10.620.20	1.14.19.2	1oq9A00	220	GLN	CSR
1.10.620.20	1.14.19.2	1oq9A00	238	LYS	CSR
1.10.620.20	1.14.19.2	1oq9A00	254	ALA	CSR
1.10.620.20	1.17.4.1	1mxrB00	77	LEU	CSR
1.10.620.20	1.17.4.1	1mxrB00	84	ASP	ASR
1.10.620.20	1.17.4.1	1mxrB00	122	TYR	ASR
1.10.620.20	1.17.4.1	1mxrB00	205	ALA	CSR
1.10.620.20	1.17.4.1	1mxrB00	208	PHE	CSR
1.10.620.20	1.17.4.1	1mxrB00	212	PHE	CSR
1.10.620.20	1.17.4.1	1mxrB00	234	ILE	CSR
1.10.620.20	1.17.4.1	1mxrB00	241	HIS	ASR
1.10.620.20	1.17.4.1	1mxrB00	283	GLU	CSR
1.10.620.20	1.17.4.1	1mxrB00	307	TYR	CSR
1.10.620.20	1.17.4.1	1mxrB00	312	THR	CSR
1.10.630.10	1.14.13.70	2cibA00	76	TYR	CSR
1.10.630.10	1.14.13.70	2cibA00	105	LEU	CSR
1.10.630.10	1.14.13.70	2cibA00	145	ILE	CSR
1.10.630.10	1.14.13.70	2cibA00	147	THR	CSR
1.10.630.10	1.14.13.70	2cibA00	152	LEU	CSR
1.10.630.10	1.14.13.70	2cibA00	197	ALA	CSR
1.10.630.10	1.14.13.70	2cibA00	251	ILE	CSR
1.10.630.10	1.14.13.70	2cibA00	259	HIS	CSR
1.10.630.10	1.14.13.70	2cibA00	261	SER	CSR
1.10.630.10	1.14.13.70	2cibA00	392	HIS	CSR
1.10.630.10	1.14.13.70	2cibA00	399	PHE	CSR
1.10.630.10	1.14.14.1	1po5A00	32	PRO	CSR
1.10.630.10	1.14.14.1	1po5A00	33	GLY	CSR
1.10.630.10	1.14.14.1	1po5A00	34	PRO	CSR
1.10.630.10	1.14.14.1	1po5A00	52	LEU	LBR
1.10.630.10	1.14.14.1	1po5A00	55	PHE	LBR
1.10.630.10	1.14.14.1	1po5A00	68	VAL	LBR
1.10.630.10	1.14.14.1	1po5A00	102	ALA	LBR
1.10.630.10	1.14.14.1	1po5A00	132	MET	LBR
1.10.630.10	1.14.14.1	1po5A00	133	ARG	LBR
1.10.630.10	1.14.14.1	1po5A00	137	MET	LBR
1.10.630.10	1.14.14.1	1po5A00	179	ILE	LBR
1.10.630.10	1.14.14.1	1po5A00	224	LEU	LBR
1.10.630.10	1.14.14.1	1po5A00	228	PRO	LBR
1.10.630.10	1.14.14.1	1po5A00	229	GLY	LBR
1.10.630.10	1.14.14.1	1po5A00	231	HIS	LBR
1.10.630.10	1.14.14.1	1po5A00	304	SER	CSR
1.10.630.10	1.14.14.1	1po5A00	306	THR	LBR
1.10.630.10	1.14.14.1	1po5A00	348	TYR	LBR
1.10.630.10	1.14.14.1	1po5A00	360	GLY	LBR
1.10.630.10	1.14.14.1	1po5A00	362	LEU	LBR
1.10.630.10	1.14.14.1	1po5A00	366	GLY	LBR
1.10.630.10	1.14.14.1	1po5A00	384	LYS	CSR
1.10.630.10	1.14.14.1	1po5A00	389	PHE	LBR
1.10.630.10	1.14.14.1	1po5A00	413	PHE	CSR
1.10.630.10	1.14.14.1	1po5A00	427	MET	LBR
1.10.630.10	1.14.14.1	1po5A00	431	LEU	LBR
1.10.630.10	1.14.14.1	1po5A00	433	LYS	LBR
1.10.630.10	1.14.14.1	1po5A00	434	ARG	LBR
1.10.630.10	1.14.14.1	1po5A00	435	ILE	LBR
1.10.630.10	1.14.14.1	1po5A00	437	LEU	LBR
1.10.630.10	1.14.14.1	1po5A00	439	GLU	LBR
1.10.630.10	1.14.14.1	1po5A00	477	VAL	LBR
1.10.640.10	1.11.1.7	1d2vC00	163	GLN	CSR
1.10.640.10	1.11.1.7	1d2vC00	170	PHE	ASR
1.10.640.10	1.11.1.7	1d2vC00	239	ARG	ASR
1.10.640.10	1.11.1.7	1d2vC00	242	GLU	ASR
1.10.640.10	1.11.1.7	1d2vC00	243	MET	ASR
1.10.640.10	1.11.1.7	1d2vC00	261	ALA	CSR
1.10.640.10	1.11.1.7	1d2vC00	289	GLN	CSR
1.10.640.10	1.11.1.7	1d2vC00	297	LEU	CSR
1.10.640.10	1.11.1.7	1d2vC00	298	PRO	CSR
1.10.640.10	1.11.1.7	1d2vC00	329	THR	LBR
1.10.640.10	1.11.1.7	1d2vC00	331	ALA	CSR
1.10.640.10	1.11.1.7	1d2vC00	333	ARG	LBR
1.10.640.10	1.11.1.7	1d2vC00	406	LEU	LBR
1.10.640.10	1.11.1.7	1d2vC00	407	PHE	LBR
1.10.640.10	1.11.1.7	1d2vC00	416	ASP	CSR
1.10.640.10	1.11.1.7	1d2vC00	424	ARG	LBR
1.10.640.10	1.11.1.7	1d2vC00	427	ASP	CSR
1.10.640.10	1.11.1.7	1d2vC00	433	TYR	CSR
1.10.640.10	1.11.1.7	1d2vC00	475	ASP	CSR
1.10.640.10	1.11.1.7	1d2vC00	510	ASP	CSR
1.10.640.10	1.11.1.7	1d2vC00	511	ARG	CSR
1.10.640.10	1.14.99.1	2oyuP02	130	TYR	CSR
1.10.640.10	1.14.99.1	2oyuP02	140	GLU	CSR
1.10.640.10	1.14.99.1	2oyuP02	146	SER	CSR
1.10.640.10	1.14.99.1	2oyuP02	149	THR	CSR
1.10.640.10	1.14.99.1	2oyuP02	187	PHE	CSR
1.10.640.10	1.14.99.1	2oyuP02	202	ALA	CSR
1.10.640.10	1.14.99.1	2oyuP02	205	PHE	LBR
1.10.640.10	1.14.99.1	2oyuP02	206	THR	LBR
1.10.640.10	1.14.99.1	2oyuP02	208	GLN	CSR
1.10.640.10	1.14.99.1	2oyuP02	210	PHE	LBR
1.10.640.10	1.14.99.1	2oyuP02	241	GLN	CSR
1.10.640.10	1.14.99.1	2oyuP02	251	LYS	CSR
1.10.640.10	1.14.99.1	2oyuP02	275	TYR	CSR
1.10.640.10	1.14.99.1	2oyuP02	291	VAL	CSR
1.10.640.10	1.14.99.1	2oyuP02	293	GLY	CSR
1.10.640.10	1.14.99.1	2oyuP02	299	MET	CSR
1.10.640.10	1.14.99.1	2oyuP02	346	GLU	CSR
1.10.640.10	1.14.99.1	2oyuP02	353	SER	LBR
1.10.640.10	1.14.99.1	2oyuP02	355	TYR	LBR
1.10.640.10	1.14.99.1	2oyuP02	384	LEU	LBR
1.10.640.10	1.14.99.1	2oyuP02	385	TYR	ASR
1.10.640.10	1.14.99.1	2oyuP02	387	TRP	LBR
1.10.640.10	1.14.99.1	2oyuP02	497	ASP	CSR
1.10.640.10	1.14.99.1	2oyuP02	502	GLU	CSR
1.10.640.10	1.14.99.1	2oyuP02	530	SER	LBR
1.10.640.10	1.14.99.1	2oyuP02	531	LEU	CSR
1.10.645.10	1.12.99.6	1cc1L00	17	ASP	CSR
1.10.645.10	1.12.99.6	1cc1L00	21	ARG	CSR
1.10.645.10	1.12.99.6	1cc1L00	44	GLY	CSR
1.10.645.10	1.12.99.6	1cc1L00	59	PRO	CSR
1.10.645.10	1.12.99.6	1cc1L00	81	SER	CSR
1.10.645.10	1.12.99.6	1cc1L00	82	VAL	CSR
1.10.645.10	1.12.99.6	1cc1L00	289	HIS	CSR
1.10.645.10	1.12.99.6	1cc1L00	318	SER	CSR
1.10.645.10	1.12.99.6	1cc1L00	376	GLY	CSR
1.10.645.10	1.12.99.6	1cc1L00	444	ILE	ASR
1.10.645.10	1.12.99.6	1cc1L00	462	GLY	CSR
1.10.645.10	1.12.99.6	1cc1L00	479	PRO	CSR
1.10.645.10	1.12.99.6	1cc1L00	484	ARG	CSR
1.10.645.10	1.12.99.6	1cc1L00	495	CYS	ASR
1.10.645.10	1.12.99.6	1cc1L00	498	HIS	ASR
1.10.730.10	6.1.1.4	1obcA04	669	PRO	CSR
1.10.730.10	6.1.1.4	1obcA04	676	TRP	CSR
1.10.730.10	6.1.1.4	1obcA04	690	ARG	CSR
1.10.730.10	6.1.1.4	1obcA04	742	ASN	CSR
1.10.730.10	6.1.1.5	1jzsA03	647	TRP	CSR
1.10.730.10	6.1.1.5	1jzsA03	715	LEU	CSR
1.10.730.10	6.1.1.5	1jzsA03	719	TYR	CSR
1.10.730.10	6.1.1.5	1jzsA03	724	ARG	CSR
1.10.730.10	6.1.1.5	1jzsA03	728	TRP	CSR
1.10.730.10	6.1.1.5	1jzsA03	755	ALA	CSR
1.10.730.10	6.1.1.9	1ivsB02	578	PHE	CSR
1.10.730.10	6.1.1.9	1ivsB02	581	LYS	CSR
1.10.730.10	6.1.1.9	1ivsB02	584	ASN	CSR
1.10.730.10	6.1.1.9	1ivsB02	651	GLU	CSR
1.10.730.10	6.1.1.9	1ivsB02	654	LYS	CSR
1.10.730.10	6.1.1.9	1ivsB02	687	THR	CSR
1.10.730.10	6.1.1.10	2d5bA03	346	GLU	CSR
1.10.730.10	6.1.1.10	2d5bA03	349	LEU	CSR
1.10.730.10	6.1.1.10	2d5bA03	359	ARG	CSR
1.10.730.10	6.1.1.10	2d5bA03	415	ASN	CSR
1.10.730.10	6.1.1.10	2d5bA03	423	PRO	CSR
1.10.730.10	6.1.1.10	2d5bA03	424	TRP	CSR
1.10.730.10	6.1.1.19	1f7vA02	491	TYR	CSR
1.10.730.10	6.1.1.19	1f7vA02	547	PRO	CSR
1.10.730.10	6.1.1.19	1f7vA02	553	TYR	CSR
1.10.730.10	6.1.1.19	1f7vA02	565	TYR	CSR
1.10.730.10	6.1.1.19	1f7vA02	584	LEU	CSR
1.10.730.10	6.1.1.19	1f7vA02	607	MET	LBR
1.10.800.10	1.14.16.1	2phmA00	248	LEU	LBR
1.10.800.10	1.14.16.1	2phmA00	249	LEU	LBR
1.10.800.10	1.14.16.1	2phmA00	251	SER	LBR
1.10.800.10	1.14.16.1	2phmA00	255	LEU	LBR
1.10.800.10	1.14.16.1	2phmA00	278	THR	LBR
1.10.800.10	1.14.16.1	2phmA00	322	ALA	LBR
1.10.800.10	1.14.16.1	2phmA00	326	TRP	LBR
1.10.800.10	1.14.16.1	2phmA00	377	TYR	CSR
1.10.800.10	1.14.16.1	2phmA00	419	GLN	LBR
1.10.800.10	1.14.16.2	1tohA00	173	GLU	CSR
1.10.800.10	1.14.16.2	1tohA00	247	HIS	CSR
1.10.800.10	1.14.16.2	1tohA00	291	VAL	LBR
1.10.800.10	1.14.16.2	1tohA00	321	PRO	CSR
1.10.800.10	1.14.16.2	1tohA00	364	ILE	CSR
1.10.800.10	1.14.16.2	1tohA00	379	LEU	CSR
1.10.800.10	1.14.16.2	1tohA00	388	ALA	CSR
1.10.800.10	1.14.16.2	1tohA00	397	TYR	CSR
1.10.800.10	1.14.16.2	1tohA00	398	GLY	CSR
1.10.800.10	1.14.16.2	1tohA00	409	GLU	CSR
1.10.800.10	1.14.16.2	1tohA00	419	ALA	CSR
1.10.800.10	1.14.16.2	1tohA00	440	ASP	CSR
1.10.1040.10	1.1.1.8	1n1gA02	210	LYS	ASR
1.10.1040.10	1.1.1.8	1n1gA02	228	ASN	CSR
1.10.1040.10	1.1.1.8	1n1gA02	262	GLY	CSR
1.10.1040.10	1.1.1.8	1n1gA02	265	GLN	CSR
1.10.1040.10	1.1.1.8	1n1gA02	273	SER	LBR
1.10.1040.10	1.1.1.8	1n1gA02	274	ARG	LBR
1.10.1040.10	1.1.1.8	1n1gA02	275	ASN	LBR
1.10.1040.10	1.1.1.8	1n1gA02	300	GLU	LBR
1.10.1040.10	1.1.1.35	3hadB02	211	LEU	LBR
1.10.1040.10	1.1.1.35	3hadB02	212	VAL	LBR
1.10.1040.10	1.1.1.35	3hadB02	233	ASP	CSR
1.10.1040.10	1.1.1.35	3hadB02	241	GLY	CSR
1.10.1040.10	1.1.1.35	3hadB02	251	ASP	CSR
1.10.1040.10	1.1.1.35	3hadB02	253	VAL	LBR
1.10.1040.10	1.1.1.35	3hadB02	293	LYS	LBR
1.10.1040.10	1.1.1.35	3hadB02	297	GLY	CSR
1.10.1040.10	1.1.1.44	1pgjB02	188	HIS	LBR
1.10.1040.10	1.1.1.44	1pgjB02	189	ASN	ASR
1.10.1040.10	1.1.1.44	1pgjB02	192	GLU	ASR
1.10.1040.10	1.1.1.44	1pgjB02	193	TYR	LBR
1.10.1040.10	1.1.1.44	1pgjB02	197	GLN	CSR
1.10.1040.10	1.1.1.44	1pgjB02	223	TRP	CSR
1.10.1040.10	1.1.1.44	1pgjB02	295	LYS	CSR
1.10.1040.10	1.1.1.44	1pgjB02	341	TYR	CSR
1.10.1040.10	1.1.1.44	1pgjB02	343	GLN	CSR
1.10.1040.10	1.1.1.44	1pgjB02	372	CYS	CSR
1.10.1040.10	1.1.1.44	1pgjB02	426	PRO	CSR
1.10.1040.10	1.1.1.67	1lj8A02	308	TYR	CSR
1.10.1040.10	1.1.1.67	1lj8A02	347	PRO	CSR
1.10.1040.10	1.1.1.67	1lj8A02	369	ASP	CSR
1.10.1040.10	1.1.1.67	1lj8A02	373	ARG	CSR
1.10.1040.10	1.1.1.67	1lj8A02	383	PRO	CSR
1.10.1040.10	1.1.1.67	1lj8A02	388	PRO	CSR
1.10.1040.10	1.1.1.67	1lj8A02	410	TRP	CSR
1.10.1040.10	1.1.1.67	1lj8A02	413	TYR	CSR
1.10.1040.10	1.1.1.86	1yveL02	324	LEU	LBR
1.10.1040.10	1.1.1.86	1yveL02	466	GLY	CSR
1.10.1040.10	1.1.1.86	1yveL02	483	GLY	CSR
1.10.1040.10	1.1.1.86	1yveL02	490	ILE	CSR
1.10.1040.10	1.1.1.86	1yveL02	493	SER	CSR
1.10.1040.10	1.1.1.86	1yveL02	496	GLU	ASR
1.10.1040.10	1.1.1.86	1yveL02	497	ALA	CSR
1.10.1040.10	1.1.1.86	1yveL02	501	LEU	LBR
1.10.1040.10	1.1.1.86	1yveL02	513	MET	CSR
1.10.1040.10	1.1.1.86	1yveL02	518	SER	LBR
1.10.1040.10	1.1.1.86	1yveL02	519	THR	LBR
1.10.1040.10	1.1.1.86	1yveL02	521	ALA	LBR
1.10.1040.10	1.1.1.86	1yveL02	524	GLY	CSR
1.10.1040.10	1.1.1.86	1yveL02	589	ARG	LBR
1.10.1040.10	1.1.1.94	1txgB02	192	LYS	CSR
1.10.1040.10	1.1.1.94	1txgB02	193	ASN	CSR
1.10.1040.10	1.1.1.94	1txgB02	249	GLY	CSR
1.10.1040.10	1.1.1.94	1txgB02	250	ASP	CSR
1.10.1040.10	1.1.1.94	1txgB02	260	ASN	CSR
1.10.1040.10	1.1.1.94	1txgB02	289	GLU	CSR
1.10.1040.10	1.1.1.169	2ofpB02	180	ASN	CSR
1.10.1040.10	1.1.1.169	2ofpB02	184	ASN	CSR
1.10.1040.10	1.1.1.169	2ofpB02	244	SER	LBR
1.10.1040.10	1.1.1.169	2ofpB02	248	ASP	CSR
1.10.1040.10	1.1.1.169	2ofpB02	256	GLU	CSR
1.10.1060.10	1.3.5.1	2h88O02	144	GLN	CSR
1.10.1060.10	1.3.5.1	2h88O02	162	ALA	CSR
1.10.1060.10	1.3.5.1	2h88O02	170	SER	CSR
1.10.1060.10	1.3.5.1	2h88O02	172	TRP	CSR
1.10.1060.10	1.3.5.1	2h88O02	173	TRP	CSR
1.10.1060.10	1.3.5.1	2h88O02	189	ARG	CSR
1.10.1060.10	1.3.99.1	3cirN02	169	GLY	CSR
1.10.1060.10	1.3.99.1	3cirN02	171	ALA	CSR
1.10.1060.10	1.3.99.1	3cirN02	178	ARG	CSR
1.10.1060.10	1.3.99.1	3cirN02	185	ASP	CSR
1.10.1060.10	1.3.99.1	3cirN02	224	ILE	CSR
1.10.1070.11	2.7.11.1	1cjaB02	214	GLY	CSR
1.10.1070.11	2.7.11.1	1cjaB02	215	ASN	CSR
1.10.1070.11	2.7.11.1	1cjaB02	232	ASP	CSR
1.10.1070.11	2.7.11.1	1cjaB02	241	SER	CSR
1.10.1070.11	2.7.11.1	1cjaB02	242	HIS	CSR
1.10.1070.11	2.7.11.1	1cjaB02	246	GLU	CSR
1.10.1070.11	2.7.11.1	1cjaB02	249	ARG	CSR
1.10.1070.11	2.7.11.1	1cjaB02	263	SER	CSR
1.10.1160.10	6.1.1.17	2dxiB03	243	LYS	LBR
1.10.1160.10	6.1.1.17	2dxiB03	244	ILE	LBR
1.10.1160.10	6.1.1.17	2dxiB03	247	ARG	LBR
1.10.1160.10	6.1.1.17	2dxiB03	314	ASN	CSR
1.10.1160.10	6.1.1.18	1nylA03	260	ARG	ASR
1.10.1160.10	6.1.1.18	1nylA03	261	LEU	LBR
1.10.1160.10	6.1.1.18	1nylA03	287	ASP	CSR
1.10.1160.10	6.1.1.18	1nylA03	288	PRO	CSR
1.10.1160.10	6.1.1.18	1nylA03	335	LEU	CSR
1.10.1200.10	6.1.1.13	1hqbA00	43	VAL	CSR
1.10.1200.10	6.1.1.13	1hqbA00	64	ARG	CSR
1.10.1200.10	6.1.1.13	1hqbA00	67	TRP	CSR
1.10.1200.10	6.1.1.13	1hqbA00	69	THR	CSR
1.10.1280.10	1.10.3.1	2p3xA00	83	GLN	CSR
1.10.1280.10	1.10.3.1	2p3xA00	88	CYS	CSR
1.10.1280.10	1.10.3.1	2p3xA00	110	SER	CSR
1.10.1280.10	1.10.3.1	2p3xA00	112	LEU	CSR
1.10.1280.10	1.10.3.1	2p3xA00	123	PHE	CSR
1.10.1280.10	1.10.3.1	2p3xA00	135	PRO	CSR
1.10.1280.10	1.10.3.1	2p3xA00	149	GLY	CSR
1.10.1280.10	1.10.3.1	2p3xA00	202	MET	CSR
1.10.1280.10	1.10.3.1	2p3xA00	207	VAL	CSR
1.10.1280.10	1.10.3.1	2p3xA00	305	PHE	CSR
1.10.1280.10	1.10.3.1	2p3xA00	319	ASP	CSR
1.10.1300.10	3.1.4.17	2chmA00	565	GLU	LBR
1.10.1300.10	3.1.4.17	2chmA00	567	SER	LBR
1.10.1300.10	3.1.4.17	2chmA00	582	LEU	LBR
1.10.1300.10	3.1.4.17	2chmA00	586	GLN	LBR
1.10.1300.10	3.1.4.17	2chmA00	615	TRP	LBR
1.10.1300.10	3.1.4.17	2chmA00	618	ALA	LBR
1.10.1300.10	3.1.4.17	2chmA00	621	THR	CSR
1.10.1300.10	3.1.4.17	2chmA00	676	TYR	CSR
1.10.1300.10	3.1.4.17	2chmA00	721	LEU	CSR
1.10.1300.10	3.1.4.17	2chmA00	765	LEU	LBR
1.10.1300.10	3.1.4.17	2chmA00	767	ALA	LBR
1.10.1300.10	3.1.4.17	2chmA00	782	VAL	LBR
1.10.1300.10	3.1.4.35	1xp0A00	561	PHE	CSR
1.10.1300.10	3.1.4.35	1xp0A00	595	LEU	CSR
1.10.1300.10	3.1.4.35	1xp0A00	607	ARG	CSR
1.10.1300.10	3.1.4.35	1xp0A00	623	GLN	CSR
1.10.1300.10	3.1.4.35	1xp0A00	693	LEU	CSR
1.10.1300.10	3.1.4.35	1xp0A00	720	ILE	CSR
1.10.1300.10	3.1.4.35	1xp0A00	735	PHE	CSR
1.10.1300.10	3.1.4.35	1xp0A00	763	CYS	CSR
1.10.1300.10	3.1.4.35	1xp0A00	765	LEU	LBR
1.10.1300.10	3.1.4.35	1xp0A00	807	ARG	CSR
1.20.58.100	1.4.3.16	1chuA03	455	ARG	CSR
1.20.58.100	1.4.3.16	1chuA03	504	ALA	CSR
1.20.58.100	1.4.3.16	1chuA03	507	ARG	CSR
1.20.58.100	1.4.3.16	1chuA03	509	GLU	CSR
1.20.58.100	1.4.3.16	1chuA03	512	GLY	CSR
1.20.140.10	1.3.3.6	2ddhA03	324	PHE	LBR
1.20.140.10	1.3.3.6	2ddhA03	389	ILE	CSR
1.20.140.10	1.3.3.6	2ddhA03	396	CYS	CSR
1.20.140.10	1.3.3.6	2ddhA03	416	PRO	LBR
1.20.140.10	1.3.3.6	2ddhA03	419	THR	LBR
1.20.140.10	1.3.3.6	2ddhA03	423	GLU	LBR
1.20.140.10	1.3.3.6	2ddhA03	428	MET	CSR
1.20.140.10	1.3.3.6	2ddhA03	429	LEU	LBR
1.20.140.10	1.3.3.6	2ddhA03	431	THR	CSR
1.20.200.10	4.2.1.2	1vdkB02	145	PRO	CSR
1.20.200.10	4.2.1.2	1vdkB02	183	LYS	CSR
1.20.200.10	4.2.1.2	1vdkB02	191	ASP	CSR
1.20.200.10	4.2.1.2	1vdkB02	230	THR	CSR
1.20.200.10	4.2.1.2	1vdkB02	302	PRO	CSR
1.20.200.10	4.2.1.2	1vdkB02	323	GLY	CSR
1.20.200.10	4.2.1.2	1vdkB02	354	GLY	CSR
1.20.200.10	4.2.1.2	1vdkB02	363	PRO	CSR
1.20.200.10	4.3.1.3	1gkmA02	197	THR	CSR
1.20.200.10	4.3.1.3	1gkmA02	278	ASP	CSR
1.20.200.10	4.3.1.3	1gkmA02	370	PHE	CSR
1.20.200.10	4.3.1.3	1gkmA02	376	GLY	CSR
1.20.200.10	4.3.1.3	1gkmA02	382	MET	CSR
1.20.200.10	4.3.1.3	1gkmA02	414	GLU	ASR
1.20.200.10	4.3.1.3	1gkmA02	417	VAL	CSR
1.20.200.10	4.3.1.3	1gkmA02	418	SER	CSR
1.20.200.10	4.3.1.3	1gkmA02	478	ASP	CSR
1.20.200.10	4.3.1.24	1y2mC02	374	PRO	CSR
1.20.200.10	4.3.1.24	1y2mC02	433	GLY	CSR
1.20.200.10	4.3.1.24	1y2mC02	434	LYS	CSR
1.20.200.10	4.3.1.24	1y2mC02	449	ASN	CSR
1.20.200.10	4.3.1.24	1y2mC02	462	SER	CSR
1.20.200.10	4.3.1.24	1y2mC02	468	LYS	CSR
1.20.200.10	4.3.1.24	1y2mC02	473	ALA	CSR
1.20.200.10	4.3.1.24	1y2mC02	491	HIS	CSR
1.20.200.10	4.3.1.24	1y2mC02	503	ASN	CSR
1.20.200.10	4.3.1.24	1y2mC02	509	SER	CSR
1.20.200.10	4.3.1.24	1y2mC02	533	GLN	CSR
1.20.200.10	4.3.1.24	1y2mC02	538	ARG	CSR
1.20.200.10	4.3.2.1	1tj7B02	109	ARG	CSR
1.20.200.10	4.3.2.1	1tj7B02	232	ARG	CSR
1.20.200.10	4.3.2.1	1tj7B02	250	SER	CSR
1.20.200.10	4.3.2.1	1tj7B02	277	SER	ASR
1.20.200.10	4.3.2.1	1tj7B02	282	GLN	CSR
1.20.200.10	4.3.2.1	1tj7B02	287	ASP	CSR
1.20.200.10	4.3.2.1	1tj7B02	290	GLU	ASR
1.20.200.10	4.3.2.1	1tj7B02	293	ARG	CSR
1.20.200.10	4.3.2.1	1tj7B02	317	TYR	LBR
1.20.200.10	4.3.2.1	1tj7B02	320	ASP	CSR
1.20.200.10	4.3.2.2	1yisA02	107	THR	CSR
1.20.200.10	4.3.2.2	1yisA02	108	SER	CSR
1.20.200.10	4.3.2.2	1yisA02	163	THR	CSR
1.20.200.10	4.3.2.2	1yisA02	165	GLY	CSR
1.20.200.10	4.3.2.2	1yisA02	196	GLY	CSR
1.20.200.10	4.3.2.2	1yisA02	237	GLN	CSR
1.20.200.10	4.3.2.2	1yisA02	298	GLU	ASR
1.20.200.10	4.3.2.2	1yisA02	326	THR	CSR
1.20.200.10	4.3.2.2	1yisA02	330	SER	CSR
1.20.200.10	4.3.2.2	1yisA02	334	ARG	CSR
1.20.245.10	1.13.11.12	2sblB05	491	SER	LBR
1.20.245.10	1.13.11.12	2sblB05	567	SER	CSR
1.20.245.10	1.13.11.12	2sblB05	609	PRO	CSR
1.20.245.10	1.13.11.12	2sblB05	659	ASP	CSR
1.20.245.10	1.13.11.12	2sblB05	665	TRP	CSR
1.20.245.10	1.13.11.12	2sblB05	666	TRP	CSR
1.20.245.10	1.13.11.12	2sblB05	684	TRP	CSR
1.20.245.10	1.13.11.12	2sblB05	702	GLY	CSR
1.20.245.10	1.13.11.12	2sblB05	757	HIS	CSR
1.20.245.10	1.13.11.12	2sblB05	811	GLY	CSR
1.20.245.10	1.13.11.12	2sblB05	832	GLY	CSR
1.20.245.10	1.13.11.33	1loxA01	425	GLY	CSR
1.20.245.10	1.13.11.33	1loxA01	462	ALA	CSR
1.20.245.10	1.13.11.33	1loxA01	466	LEU	CSR
1.20.245.10	1.13.11.33	1loxA01	535	PHE	CSR
1.20.245.10	1.13.11.33	1loxA01	612	GLU	CSR
1.20.245.10	1.13.11.33	1loxA01	615	PHE	CSR
1.20.910.10	1.3.3.11	1otvB00	50	ARG	LBR
1.20.910.10	1.3.3.11	1otvB00	84	HIS	LBR
1.20.910.10	1.3.3.11	1otvB00	86	GLY	CSR
1.20.910.10	1.3.3.11	1otvB00	93	GLY	CSR
1.20.910.10	1.3.3.11	1otvB00	147	GLU	LBR
1.20.910.10	1.3.3.11	1otvB00	157	ARG	LBR
1.20.910.10	1.3.3.11	1otvB00	179	ARG	LBR
1.20.910.10	1.3.3.11	1otvB00	213	PHE	CSR
1.20.910.10	1.3.3.11	1otvB00	214	LYS	LBR
1.20.910.10	1.3.3.11	1otvB00	222	LEU	CSR
1.20.910.10	1.3.3.11	1otvB00	223	ASP	CSR
1.20.910.10	1.3.3.11	1otvB00	235	PRO	CSR
1.20.910.10	1.14.99.3	2zvuA00	28	ALA	LBR
1.20.910.10	1.14.99.3	2zvuA00	29	GLU	LBR
1.20.910.10	1.14.99.3	2zvuA00	50	VAL	LBR
1.20.910.10	1.14.99.3	2zvuA00	62	GLU	CSR
1.20.910.10	1.14.99.3	2zvuA00	101	TRP	CSR
1.20.910.10	1.14.99.3	2zvuA00	117	ARG	CSR
1.20.910.10	1.14.99.3	2zvuA00	139	GLY	ASR
1.20.910.10	1.14.99.3	2zvuA00	144	GLY	ASR
1.20.910.10	1.14.99.3	2zvuA00	166	PHE	LBR
1.20.910.10	1.14.99.3	2zvuA00	179	LYS	LBR
1.20.910.10	1.14.99.3	2zvuA00	202	GLU	CSR
1.20.910.10	1.14.99.3	2zvuA00	207	PHE	LBR
1.20.920.10	2.3.1.48	3dwyB00	1110	PRO	CSR
1.20.920.10	2.3.1.48	3dwyB00	1115	VAL	CSR
1.20.920.10	2.3.1.48	3dwyB00	1161	PHE	CSR
1.20.920.10	2.3.1.48	3dwyB00	1168	ASN	CSR
1.20.920.10	2.3.1.48	3dwyB00	1181	LEU	CSR
1.20.960.20	3.4.22.28	2ijfA03	416	SER	CSR
1.20.960.20	3.4.22.28	2ijfA03	429	TYR	CSR
1.20.960.20	3.4.22.28	2ijfA03	450	TYR	CSR
1.20.960.20	3.4.22.29	2ijfA03	386	PHE	CSR
1.20.960.20	3.4.22.29	2ijfA03	405	LYS	CSR
1.20.960.20	3.4.22.29	2ijfA03	416	SER	CSR
1.20.960.20	3.4.22.29	2ijfA03	429	TYR	CSR
1.20.970.10	2.4.2.4	2tptA01	41	ALA	CSR
1.20.970.10	2.4.2.4	2tptA01	67	GLY	CSR
1.20.970.10	2.4.2.4	2tptA01	171	ARG	ASR
1.20.970.10	2.4.2.4	2tptA01	190	LYS	ASR
1.20.970.10	2.4.2.18	1khdD01	164	ALA	LBR
1.20.970.10	2.4.2.18	1khdD01	168	HIS	LBR
1.20.970.10	2.4.2.18	1khdD01	185	THR	CSR
1.20.970.10	2.4.2.18	1khdD01	187	PHE	CSR
1.20.970.10	2.4.2.18	1khdD01	188	ASN	CSR
1.20.970.10	2.4.2.18	1khdD01	191	GLY	LBR
1.20.970.10	2.4.2.18	1khdD01	192	PRO	LBR
1.20.970.10	2.4.2.18	1khdD01	195	ASN	CSR
1.20.990.10	1.6.2.4	1ja1B03	360	PRO	CSR
1.20.990.10	1.6.2.4	1ja1B03	364	PRO	CSR
1.20.990.10	1.6.2.4	1ja1B03	424	ARG	LBR
1.20.990.10	1.6.2.4	1ja1B03	440	PRO	CSR
1.20.990.10	1.8.1.2	1ddiA02	286	LEU	CSR
1.20.990.10	1.8.1.2	1ddiA02	314	ALA	CSR
1.20.990.10	1.8.1.2	1ddiA02	320	GLU	CSR
1.20.990.10	1.8.1.2	1ddiA02	322	THR	LBR
1.20.990.10	1.8.1.2	1ddiA02	323	VAL	LBR
1.20.990.10	1.8.1.2	1ddiA02	329	VAL	CSR
1.20.990.10	1.8.1.2	1ddiA02	381	ARG	LBR
1.20.990.10	1.14.13.39	1f20A02	1103	PRO	CSR
1.20.990.10	1.14.13.39	1f20A02	1138	TRP	CSR
1.20.990.10	1.14.13.39	1f20A02	1144	PRO	CSR
1.20.990.10	1.14.13.39	1f20A02	1148	GLU	CSR
1.20.990.10	1.14.13.39	1f20A02	1153	PHE	CSR
1.20.990.10	1.14.13.39	1f20A02	1166	GLN	CSR
1.20.1050.10	2.5.1.18	2c3nD02	85	TYR	LBR
1.20.1050.10	2.5.1.18	2c3nD02	89	LEU	LBR
1.20.1050.10	2.5.1.18	2c3nD02	92	ARG	LBR
1.20.1050.10	2.5.1.18	2c3nD02	100	ALA	LBR
1.20.1050.10	2.5.1.18	2c3nD02	103	HIS	LBR
1.20.1050.10	2.5.1.18	2c3nD02	106	LEU	LBR
1.20.1050.10	2.5.1.18	2c3nD02	107	ARG	LBR
1.20.1050.10	2.5.1.18	2c3nD02	108	ARG	LBR
1.20.1050.10	2.5.1.18	2c3nD02	109	SER	LBR
1.20.1050.10	2.5.1.18	2c3nD02	111	LEU	LBR
1.20.1050.10	2.5.1.18	2c3nD02	123	PHE	LBR
1.20.1050.10	2.5.1.18	2c3nD02	139	GLU	LBR
1.20.1050.10	2.5.1.18	2c3nD02	163	ILE	LBR
1.20.1050.10	2.5.1.18	2c3nD02	176	HIS	LBR
1.20.1050.10	2.5.1.18	2c3nD02	180	ALA	LBR
1.20.1050.10	2.5.1.18	2c3nD02	189	PRO	CSR
1.20.1050.10	2.5.1.18	2c3nD02	197	ARG	LBR
1.20.1050.10	2.5.1.18	2c3nD02	215	LEU	LBR
1.20.1050.10	2.5.1.18	2c3nD02	217	ALA	LBR
1.20.1050.10	2.5.1.18	2c3nD02	218	LYS	LBR
1.20.1050.10	2.5.1.18	2c3nD02	231	LEU	LBR
1.20.1050.10	5.2.1.2	2cz2A02	115	ASN	LBR
1.20.1050.10	5.2.1.2	2cz2A02	116	LEU	LBR
1.20.1050.10	5.2.1.2	2cz2A02	130	TRP	CSR
1.20.1050.10	5.2.1.2	2cz2A02	173	ALA	CSR
1.20.1050.10	5.2.1.2	2cz2A02	175	ARG	LBR
1.20.1050.10	5.2.1.2	2cz2A02	199	PHE	CSR
1.20.1090.10	4.2.3.4	1nveC02	183	LEU	LBR
1.20.1090.10	4.2.3.4	1nveC02	194	GLU	CSR
1.20.1090.10	4.2.3.4	1nveC02	197	LYS	LBR
1.20.1090.10	4.2.3.4	1nveC02	250	LYS	ASR
1.20.1090.10	4.2.3.4	1nveC02	257	ASP	CSR
1.20.1090.10	4.2.3.4	1nveC02	264	ARG	ASR
1.20.1090.10	4.2.3.4	1nveC02	268	ASN	ASR
1.20.1090.10	4.2.3.4	1nveC02	270	GLY	CSR
1.20.1110.10	3.6.3.6	3b8cB01	308	GLY	CSR
1.20.1110.10	3.6.3.6	3b8cB01	317	ILE	CSR
1.20.1110.10	3.6.3.6	3b8cB01	666	ILE	CSR
1.20.1110.10	3.6.3.6	3b8cB01	680	ALA	CSR
1.20.1110.10	3.6.3.6	3b8cB01	704	TRP	CSR
1.20.1110.10	3.6.3.6	3b8cB01	762	SER	CSR
1.20.1110.10	3.6.3.6	3b8cB01	770	PHE	CSR
1.20.1110.10	3.6.3.6	3b8cB01	773	ARG	CSR
1.20.1110.10	3.6.3.8	1wpgC02	283	VAL	CSR
1.20.1110.10	3.6.3.8	1wpgC02	288	TRP	CSR
1.20.1110.10	3.6.3.8	1wpgC02	291	GLY	CSR
1.20.1110.10	3.6.3.8	1wpgC02	293	ILE	CSR
1.20.1110.10	3.6.3.8	1wpgC02	294	TYR	CSR
1.20.1110.10	3.6.3.8	1wpgC02	316	THR	CSR
1.20.1110.10	3.6.3.8	1wpgC02	317	THR	CSR
1.20.1110.10	3.6.3.8	1wpgC02	330	ASN	CSR
1.20.1110.10	3.6.3.8	1wpgC02	333	VAL	CSR
1.20.1110.10	3.6.3.8	1wpgC02	750	GLY	CSR
1.20.1110.10	3.6.3.8	1wpgC02	760	PHE	CSR
1.20.1110.10	3.6.3.8	1wpgC02	791	GLN	CSR
1.20.1110.10	3.6.3.8	1wpgC02	794	TRP	CSR
1.20.1110.10	3.6.3.8	1wpgC02	796	ASN	CSR
1.20.1110.10	3.6.3.8	1wpgC02	821	PRO	CSR
1.20.1110.10	3.6.3.9	3b8eC02	793	LEU	CSR
1.20.1110.10	3.6.3.9	3b8eC02	797	THR	CSR
1.20.1110.10	3.6.3.9	3b8eC02	817	TYR	CSR
1.20.1110.10	3.6.3.9	3b8eC02	843	ILE	CSR
1.20.1110.10	3.6.3.9	3b8eC02	848	GLY	CSR
1.20.1110.10	3.6.3.9	3b8eC02	858	GLY	CSR
1.20.1110.10	3.6.3.9	3b8eC02	919	ILE	CSR
1.20.1110.10	3.6.3.9	3b8eC02	924	TRP	CSR
1.20.1110.10	3.6.3.9	3b8eC02	926	ASP	CSR
1.20.1110.10	3.6.3.9	3b8eC02	949	PHE	CSR
1.20.1110.10	3.6.3.9	3b8eC02	954	GLU	CSR
1.20.1110.10	3.6.3.9	3b8eC02	966	GLY	CSR
1.20.1260.10	1.16.3.1	2cihA00	21	ASN	CSR
1.20.1260.10	1.16.3.1	2cihA00	25	ASN	CSR
1.20.1260.10	1.16.3.1	2cihA00	76	ARG	CSR
1.20.1260.10	1.16.3.1	2cihA00	104	LEU	CSR
1.20.1260.10	1.16.3.1	2cihA00	140	GLU	CSR
1.20.1260.10	1.16.3.1	2cihA00	141	GLN	CSR
1.25.40.10	1.14.11.2	1tjcB00	151	PHE	CSR
1.25.40.10	1.14.11.2	1tjcB00	164	TYR	CSR
1.25.40.10	1.14.11.2	1tjcB00	165	HIS	CSR
1.25.40.10	1.14.11.2	1tjcB00	210	LEU	CSR
1.25.40.10	1.14.11.2	1tjcB00	232	GLU	CSR
1.25.40.10	3.5.2.6	1ouvA00	212	GLY	CSR
1.25.40.10	3.5.2.6	1ouvA00	215	TYR	CSR
1.25.40.10	3.5.2.6	1ouvA00	236	CYS	CSR
1.25.40.10	3.5.2.6	1ouvA00	244	CYS	CSR
1.25.40.10	5.2.1.8	1p5qC02	354	LYS	CSR
1.25.40.10	5.2.1.8	1p5qC02	358	ARG	CSR
1.25.40.10	5.2.1.8	1p5qC02	360	GLY	CSR
1.50.10.10	3.2.1.3	2fbaA00	69	ARG	ASR
1.50.10.10	3.2.1.3	2fbaA00	70	ASP	LBR
1.50.10.10	3.2.1.3	2fbaA00	147	PRO	CSR
1.50.10.10	3.2.1.3	2fbaA00	194	LEU	CSR
1.50.10.10	3.2.1.3	2fbaA00	210	GLU	ASR
1.50.10.10	3.2.1.3	2fbaA00	211	GLU	LBR
1.50.10.10	3.2.1.3	2fbaA00	219	THR	CSR
1.50.10.10	3.2.1.3	2fbaA00	348	GLU	CSR
1.50.10.10	3.2.1.3	2fbaA00	351	TYR	LBR
1.50.10.10	3.2.1.3	2fbaA00	362	TRP	LBR
1.50.10.10	3.2.1.3	2fbaA00	463	GLY	CSR
1.50.10.10	3.2.1.3	2fbaA00	468	ALA	CSR
1.50.10.10	3.2.1.3	2fbaA00	473	TRP	LBR
1.50.10.10	3.2.1.4	1clcA02	139	TYR	CSR
1.50.10.10	3.2.1.4	1clcA02	155	CYS	ASR
1.50.10.10	3.2.1.4	1clcA02	195	GLY	CSR
1.50.10.10	3.2.1.4	1clcA02	197	HIS	ASR
1.50.10.10	3.2.1.4	1clcA02	198	ASP	ASR
1.50.10.10	3.2.1.4	1clcA02	200	GLY	CSR
1.50.10.10	3.2.1.4	1clcA02	201	ASP	ASR
1.50.10.10	3.2.1.4	1clcA02	209	ALA	LBR
1.50.10.10	3.2.1.4	1clcA02	241	ILE	ASR
1.50.10.10	3.2.1.4	1clcA02	295	SER	LBR
1.50.10.10	3.2.1.4	1clcA02	373	THR	CSR
1.50.10.10	3.2.1.4	1clcA02	399	ASP	LBR
1.50.10.10	3.2.1.4	1clcA02	495	GLY	CSR
1.50.10.10	3.2.1.4	1clcA02	502	SER	CSR
1.50.10.10	3.2.1.4	1clcA02	506	GLY	CSR
1.50.10.10	3.2.1.4	1clcA02	508	GLY	CSR
1.50.10.10	3.2.1.4	1clcA02	512	PRO	CSR
1.50.10.10	3.2.1.4	1clcA02	516	HIS	LBR
1.50.10.10	3.2.1.4	1clcA02	555	GLU	ASR
1.50.10.10	3.2.1.4	1clcA02	557	ALA	LBR
1.50.10.20	5.4.99.17	2sqcB01	312	TRP	ASR
1.50.10.20	5.4.99.17	2sqcB01	316	LEU	ASR
1.50.10.20	5.4.99.17	2sqcB01	353	VAL	CSR
1.50.10.20	5.4.99.17	2sqcB01	363	PHE	CSR
1.50.10.20	5.4.99.17	2sqcB01	365	PHE	ASR
1.50.10.20	5.4.99.17	2sqcB01	369	ASN	CSR
1.50.10.20	5.4.99.17	2sqcB01	374	ASP	ASR
1.50.10.20	5.4.99.17	2sqcB01	377	ASP	ASR
1.50.10.20	5.4.99.17	2sqcB01	437	PHE	LBR
1.50.10.20	5.4.99.17	2sqcB01	440	VAL	CSR
1.50.10.20	5.4.99.17	2sqcB01	443	PRO	CSR
1.50.10.20	5.4.99.17	2sqcB01	451	HIS	ASR
1.50.10.20	5.4.99.17	2sqcB01	552	THR	LBR
1.50.10.20	5.4.99.17	2sqcB01	605	PHE	ASR
2.10.10.10	3.4.24.35	1l6jA03	232	PHE	CSR
2.10.10.10	3.4.24.35	1l6jA03	233	PRO	CSR
2.10.10.10	3.4.24.35	1l6jA03	241	TYR	CSR
2.10.10.10	3.4.24.35	1l6jA03	248	GLY	CSR
2.10.10.10	3.4.24.35	1l6jA03	249	ARG	CSR
2.10.25.10	1.14.99.1	1eqhB01	62	THR	CSR
2.10.25.10	1.14.99.1	1eqhB01	63	GLY	CSR
2.10.25.10	1.14.99.1	1eqhB01	66	GLY	CSR
2.10.25.10	3.4.21.6	2h9eL00	111	CYS	CSR
2.10.25.10	3.4.21.6	2h9eL00	124	CYS	CSR
2.10.25.10	3.4.21.22	1rfnB00	99	CYS	CSR
2.10.25.10	3.4.21.22	1rfnB00	109	CYS	CSR
2.10.25.10	3.4.21.22	1rfnB00	111	CYS	CSR
2.10.25.10	3.4.21.69	1autL02	105	CYS	CSR
2.10.25.10	3.4.21.69	1autL02	109	CYS	CSR
2.10.25.10	3.4.21.69	1autL02	118	CYS	CSR
2.10.70.10	3.4.21.42	1elvA03	358	PRO	CSR
2.10.70.10	3.4.21.42	1elvA03	392	GLY	CSR
2.10.70.10	3.4.21.42	1elvA03	399	LEU	CSR
2.10.109.10	3.4.21.88	1jhfB00	75	GLY	CSR
2.10.109.10	3.4.21.88	1jhfB00	119	SER	ASR
2.10.109.10	3.4.21.88	1jhfB00	120	MET	CSR
2.10.109.10	3.4.21.88	1jhfB00	125	ILE	CSR
2.10.109.10	3.4.21.88	1jhfB00	154	THR	CSR
2.10.109.10	3.4.21.88	1jhfB00	156	LYS	ASR
2.10.109.10	3.4.21.89	1b12C01	90	SER	ASR
2.10.109.10	3.4.21.89	1b12C01	91	MET	CSR
2.10.109.10	3.4.21.89	1b12C01	145	LYS	ASR
2.10.109.10	3.4.21.89	1b12C01	273	ASP	CSR
2.10.109.10	3.4.21.89	1b12C01	281	SER	CSR
2.10.109.10	3.4.21.89	1b12C01	285	GLY	CSR
2.10.220.10	2.7.10.1	2hr7A02	237	CYS	CSR
2.10.220.10	2.7.10.1	2hr7A02	241	CYS	CSR
2.20.25.10	2.7.7.6	1qypA00	18	CYS	CSR
2.20.25.10	2.7.7.6	1qypA00	46	CYS	CSR
2.20.25.10	2.7.7.6	1qypA00	49	CYS	CSR
2.20.25.90	1.2.1.2	2iv2X01	8	CYS	CSR
2.20.25.90	1.2.1.2	2iv2X01	14	GLY	CSR
2.20.25.90	1.2.1.2	2iv2X01	42	CYS	CSR
2.20.25.90	1.2.1.2	2iv2X01	44	LYS	ASR
2.20.25.90	1.7.99.4	2napA01	13	CYS	CSR
2.20.25.90	1.7.99.4	2napA01	47	CYS	CSR
2.20.25.90	1.7.99.4	2napA01	50	GLY	CSR
2.30.29.30	2.7.11.1	1w1hD00	436	ARG	CSR
2.30.29.30	2.7.11.1	1w1hD00	437	LEU	CSR
2.30.29.30	2.7.11.1	1w1hD00	448	TRP	CSR
2.30.29.30	2.7.11.1	1w1hD00	463	VAL	CSR
2.30.29.30	2.7.11.1	1w1hD00	539	ILE	CSR
2.30.29.30	3.1.4.11	1maiA00	36	TRP	LBR
2.30.29.30	3.1.4.11	1maiA00	40	ARG	LBR
2.30.29.30	3.1.4.11	1maiA00	57	LYS	LBR
2.30.29.30	3.1.4.11	1maiA00	76	ARG	CSR
2.30.29.30	3.1.4.11	1maiA00	78	GLY	CSR
2.30.29.30	3.1.4.11	1maiA00	99	ILE	CSR
2.30.29.30	3.1.4.11	1maiA00	108	LEU	CSR
2.30.29.30	3.1.4.11	1maiA00	128	ILE	CSR
2.30.29.30	3.6.5.5	1dynB00	13	ILE	CSR
2.30.29.30	3.6.5.5	1dynB00	90	LYS	CSR
2.30.29.30	3.6.5.5	1dynB00	110	ALA	CSR
2.30.29.30	3.6.5.5	1dynB00	113	LEU	CSR
2.30.29.30	3.6.5.5	1dynB00	115	ALA	CSR
2.30.30.10	3.4.23.16	1c6vX00	244	LYS	CSR
2.30.30.10	3.4.23.16	1c6vX00	248	ALA	CSR
2.30.30.10	3.4.23.16	1c6vX00	262	ARG	CSR
2.30.30.40	2.7.10.2	1awjA00	34	ASN	LBR
2.30.30.40	2.7.10.2	1awjA00	39	LEU	CSR
2.30.30.40	2.7.10.2	1awjA00	68	GLY	CSR
2.30.30.40	2.7.10.2	1awjA00	71	PRO	CSR
2.30.38.10	5.1.1.11	1amuB03	354	ASN	CSR
2.30.38.10	5.1.1.11	1amuB03	393	THR	CSR
2.30.38.10	5.1.1.11	1amuB03	401	PRO	CSR
2.30.38.10	5.1.1.11	1amuB03	404	PRO	CSR
2.30.38.10	5.1.1.11	1amuB03	425	TYR	LBR
2.30.40.10	3.5.1.5	2kauC01	67	ASP	CSR
2.30.40.10	3.5.1.5	2kauC01	80	GLY	CSR
2.30.40.10	3.5.1.5	2kauC01	100	GLY	CSR
2.30.40.10	3.5.1.5	2kauC01	101	ASN	CSR
2.30.40.10	3.5.1.25	2vhlA01	49	ALA	CSR
2.30.40.10	3.5.2.2	1ynyA01	404	LEU	CSR
2.30.40.10	3.5.2.2	1ynyA01	434	GLY	CSR
2.30.40.10	3.5.2.2	1ynyA01	437	VAL	CSR
2.30.40.10	3.5.2.2	1ynyA01	441	LYS	CSR
2.30.40.10	3.5.2.5	3e74A01	34	GLY	CSR
2.30.40.10	3.5.2.5	3e74A01	48	GLY	CSR
2.30.40.10	3.5.2.5	3e74A01	51	VAL	CSR
2.30.42.10	2.7.11.1	1kwaB00	533	GLY	CSR
2.30.42.10	2.7.11.1	1kwaB00	536	ILE	CSR
2.30.42.10	2.7.11.1	1kwaB00	540	ASN	CSR
2.30.42.10	2.7.11.1	1kwaB00	541	GLY	CSR
2.30.42.10	2.7.11.1	1kwaB00	543	SER	CSR
2.30.42.10	3.1.3.48	1gm1A00	32	GLY	CSR
2.30.42.10	3.1.3.48	1gm1A00	49	PRO	CSR
2.30.42.10	3.1.3.48	1gm1A00	53	ALA	CSR
2.30.42.10	3.1.3.48	1gm1A00	69	ASN	CSR
2.30.42.10	3.1.3.48	1gm1A00	85	LEU	CSR
2.40.10.10	2.7.7.48	2zu1B01	144	ALA	LBR
2.40.10.10	2.7.7.48	2zu1B01	147	ALA	ASR
2.40.10.10	2.7.7.48	2zu1B01	155	GLY	ASR
2.40.10.10	2.7.7.48	2zu1B01	160	ILE	CSR
2.40.10.10	2.7.7.48	2zu1B01	161	HIS	LBR
2.40.10.10	2.7.7.48	2zu1B01	162	VAL	ASR
2.40.10.10	2.7.7.48	2zu1B01	163	GLY	LBR
2.40.10.10	2.7.7.48	2zu1B01	165	ASN	LBR
2.40.10.10	2.7.7.48	2zu1B01	167	HIS	ASR
2.40.10.10	2.7.7.48	2zu1B01	170	PHE	LBR
2.40.10.10	3.4.21.1	8gchF00	30	GLN	CSR
2.40.10.10	3.4.21.1	8gchF00	59	GLY	LBR
2.40.10.10	3.4.21.1	8gchF00	61	THR	LBR
2.40.10.10	3.4.21.1	8gchF00	62	THR	ASR
2.40.10.10	3.4.21.1	8gchF00	63	SER	ASR
2.40.10.10	3.4.21.1	8gchF00	88	VAL	LBR
2.40.10.10	3.4.21.1	8gchF00	89	PHE	LBR
2.40.10.10	3.4.21.1	8gchF00	93	LYS	LBR
2.40.10.10	3.4.21.1	8gchF00	99	ILE	LBR
2.40.10.10	3.4.21.2	1pytD01	862	VAL	CSR
2.40.10.10	3.4.21.2	1pytD01	868	CYS	CSR
2.40.10.10	3.4.21.2	1pytD01	894	ASP	CSR
2.40.10.10	3.4.21.4	1ezxC00	157	CYS	LBR
2.40.10.10	3.4.21.4	1ezxC00	158	LEU	LBR
2.40.10.10	3.4.21.4	1ezxC00	159	LYS	LBR
2.40.10.10	3.4.21.4	1ezxC00	192	GLN	LBR
2.40.10.10	3.4.21.4	1ezxC00	193	GLY	ASR
2.40.10.10	3.4.21.4	1ezxC00	213	VAL	LBR
2.40.10.10	3.4.21.4	1ezxC00	215	TRP	LBR
2.40.10.10	3.4.21.4	1ezxC00	217	SER	LBR
2.40.10.10	3.4.21.4	1ezxC00	222	LYS	ASR
2.40.10.10	3.4.21.5	2pksB00	62	LEU	LBR
2.40.10.10	3.4.21.5	2pksB00	63	LEU	LBR
2.40.10.10	3.4.21.5	2pksB00	85	PRO	CSR
2.40.10.10	3.4.21.5	2pksB00	86	TRP	LBR
2.40.10.10	3.4.21.5	2pksB00	91	THR	ASR
2.40.10.10	3.4.21.5	2pksB00	92	GLU	LBR
2.40.10.10	3.4.21.5	2pksB00	93	ASN	ASR
2.40.10.10	3.4.21.5	2pksB00	117	LEU	LBR
2.40.10.10	3.4.21.5	2pksB00	121	TYR	LBR
2.40.10.10	3.4.21.5	2pksB00	122	ILE	LBR
2.40.10.10	3.4.21.5	2pksB00	132	LEU	LBR
2.40.10.10	3.4.21.6	2jkhA01	148	LYS	CSR
2.40.10.10	3.4.21.6	2jkhA01	149	GLY	CSR
2.40.10.10	3.4.21.7	1l4zA01	570	PRO	CSR
2.40.10.10	3.4.21.7	1l4zA01	684	GLY	CSR
2.40.10.10	3.4.21.7	1l4zA01	736	SER	LBR
2.40.10.10	3.4.21.7	1l4zA01	738	GLN	ASR
2.40.10.10	3.4.21.7	1l4zA01	740	ASP	ASR
2.40.10.10	3.4.21.7	1l4zA01	760	SER	LBR
2.40.10.10	3.4.21.7	1l4zA01	764	GLY	LBR
2.40.10.10	3.4.21.7	1l4zA01	769	ASN	ASR
2.40.10.10	3.4.21.9	1ekbB01	174	TYR	LBR
2.40.10.10	3.4.21.9	1ekbB01	190	SER	LBR
2.40.10.10	3.4.21.9	1ekbB01	192	GLN	LBR
2.40.10.10	3.4.21.9	1ekbB01	213	THR	LBR
2.40.10.10	3.4.21.9	1ekbB01	215	PHE	LBR
2.40.10.10	3.4.21.9	1ekbB01	223	ASN	ASR
2.40.10.10	3.4.21.10	1fiwA01	27	TRP	CSR
2.40.10.10	3.4.21.10	1fiwA01	132	VAL	CSR
2.40.10.10	3.4.21.10	1fiwA01	143	PHE	CSR
2.40.10.10	3.4.21.21	1jbuH01	121	LEU	CSR
2.40.10.10	3.4.21.21	1jbuH01	135	PHE	CSR
2.40.10.10	3.4.21.22	1rfnA01	174	PHE	LBR
2.40.10.10	3.4.21.22	1rfnA01	186	GLU	ASR
2.40.10.10	3.4.21.22	1rfnA01	190	SER	LBR
2.40.10.10	3.4.21.22	1rfnA01	192	GLN	LBR
2.40.10.10	3.4.21.22	1rfnA01	219	GLU	LBR
2.40.10.10	3.4.21.22	1rfnA01	221A	MET	LBR
2.40.10.10	3.4.21.22	1rfnA01	224	LYS	ASR
2.40.10.10	3.4.21.34	2anyA01	137	TRP	CSR
2.40.10.10	3.4.21.34	2anyA01	186A	GLY	CSR
2.40.10.10	3.4.21.35	1hiaY00	102	ASP	ASR
2.40.10.10	3.4.21.35	1hiaY00	158	VAL	LBR
2.40.10.10	3.4.21.35	1hiaY00	190	THR	LBR
2.40.10.10	3.4.21.35	1hiaY00	192	MET	LBR
2.40.10.10	3.4.21.35	1hiaY00	194	ASP	LBR
2.40.10.10	3.4.21.35	1hiaY00	203	GLY	CSR
2.40.10.10	3.4.21.35	1hiaY00	217	HIS	ASR
2.40.10.10	3.4.21.35	1hiaY00	221	SER	ASR
2.40.10.10	3.4.21.35	1hiaY00	224	LYS	ASR
2.40.10.10	3.4.21.35	1hiaY00	226	SER	LBR
2.40.10.10	3.4.21.36	9estA02	38	TRP	LBR
2.40.10.10	3.4.21.36	9estA02	41	THR	LBR
2.40.10.10	3.4.21.36	9estA02	59	VAL	LBR
2.40.10.10	3.4.21.36	9estA02	70	GLU	ASR
2.40.10.10	3.4.21.36	9estA02	72	ASN	ASR
2.40.10.10	3.4.21.36	9estA02	74	ASN	LBR
2.40.10.10	3.4.21.36	9estA02	75	GLN	ASR
2.40.10.10	3.4.21.36	9estA02	80	GLU	ASR
2.40.10.10	3.4.21.36	9estA02	91	HIS	LBR
2.40.10.10	3.4.21.36	9estA02	94	TRP	LBR
2.40.10.10	3.4.21.36	9estA02	99	VAL	LBR
2.40.10.10	3.4.21.36	9estA02	99A	ALA	LBR
2.40.10.10	3.4.21.36	9estA02	100	GLY	CSR
2.40.10.10	3.4.21.39	1nn6A01	177	HIS	CSR
2.40.10.10	3.4.21.39	1nn6A01	193	PHE	LBR
2.40.10.10	3.4.21.39	1nn6A01	194	LYS	LBR
2.40.10.10	3.4.21.39	1nn6A01	213	TYR	LBR
2.40.10.10	3.4.21.39	1nn6A01	214	GLY	LBR
2.40.10.10	3.4.21.39	1nn6A01	218	ALA	LBR
2.40.10.10	3.4.21.39	1nn6A01	220	PRO	ASR
2.40.10.10	3.4.21.41	2qy0D01	601	GLN	ASR
2.40.10.10	3.4.21.41	2qy0D01	637	SER	ASR
2.40.10.10	3.4.21.41	2qy0D01	651	TRP	ASR
2.40.10.10	3.4.21.42	1elvA02	615	GLY	CSR
2.40.10.10	3.4.21.42	1elvA02	640	TRP	CSR
2.40.10.10	3.4.21.42	1elvA02	654	LYS	CSR
2.40.10.10	3.4.21.46	1fdpA01	188	ARG	ASR
2.40.10.10	3.4.21.46	1fdpA01	192	LYS	LBR
2.40.10.10	3.4.21.46	1fdpA01	215	SER	LBR
2.40.10.10	3.4.21.46	1fdpA01	218	ARG	LBR
2.40.10.10	3.4.21.46	1fdpA01	224	LYS	ASR
2.40.10.10	3.4.21.59	2f9nD01	152B	PRO	CSR
2.40.10.10	3.4.21.59	2f9nD01	187	GLN	ASR
2.40.10.10	3.4.21.59	2f9nD01	190	SER	LBR
2.40.10.10	3.4.21.59	2f9nD01	192	GLN	CSR
2.40.10.10	3.4.21.59	2f9nD01	193	GLY	ASR
2.40.10.10	3.4.21.59	2f9nD01	195	SER	ASR
2.40.10.10	3.4.21.68	1rtfB01	161	ARG	CSR
2.40.10.10	3.4.21.68	1rtfB01	163	TYR	CSR
2.40.10.10	3.4.21.68	1rtfB01	190	ALA	LBR
2.40.10.10	3.4.21.68	1rtfB01	192	GLN	LBR
2.40.10.10	3.4.21.68	1rtfB01	195	SER	ASR
2.40.10.10	3.4.21.68	1rtfB01	207	MET	ASR
2.40.10.10	3.4.21.68	1rtfB01	214	SER	LBR
2.40.10.10	3.4.21.68	1rtfB01	219	GLY	LBR
2.40.10.10	3.4.21.69	3f6uH01	16	LEU	CSR
2.40.10.10	3.4.21.69	3f6uH01	189	ASP	LBR
2.40.10.10	3.4.21.69	3f6uH01	190	ALA	LBR
2.40.10.10	3.4.21.69	3f6uH01	191	CYS	LBR
2.40.10.10	3.4.21.69	3f6uH01	195	SER	ASR
2.40.10.10	3.4.21.69	3f6uH01	214	SER	LBR
2.40.10.10	3.4.21.69	3f6uH01	224	ASN	ASR
2.40.10.10	3.4.21.71	1bruP01	168	CYS	CSR
2.40.10.10	3.4.21.71	1bruP01	188	ILE	ASR
2.40.10.10	3.4.21.71	1bruP01	192	ASN	LBR
2.40.10.10	3.4.21.71	1bruP01	207	TRP	CSR
2.40.10.10	3.4.21.71	1bruP01	222	TYR	ASR
2.40.10.10	3.4.21.73	2o8tA01	185B	GLN	ASR
2.40.10.10	3.4.21.73	2o8tA01	186	TRP	LBR
2.40.10.10	3.4.21.73	2o8tA01	190	SER	LBR
2.40.10.10	3.4.21.73	2o8tA01	192	GLN	LBR
2.40.10.10	3.4.21.73	2o8tA01	195	SER	ASR
2.40.10.10	3.4.21.73	2o8tA01	217	ARG	LBR
2.40.10.10	3.4.21.73	2o8tA01	219	GLY	LBR
2.40.10.10	3.4.21.73	2o8tA01	222	LEU	LBR
2.40.10.10	3.4.21.73	2o8tA01	223	LYS	ASR
2.40.10.10	3.4.21.74	2aiqA02	57	HIS	CSR
2.40.10.10	3.4.21.74	2aiqA02	91	CYS	CSR
2.40.10.10	3.4.21.90	1svpB02	208	GLY	CSR
2.40.10.10	3.4.21.90	1svpB02	213	GLY	CSR
2.40.10.10	3.4.21.90	1svpB02	224	GLY	CSR
2.40.10.10	3.4.21.90	1svpB02	231	LEU	CSR
2.40.10.10	3.4.21.104	1q3xB02	458	TRP	CSR
2.40.10.10	3.4.21.104	1q3xB02	558	ALA	CSR
2.40.10.10	3.4.22.28	2zu1B01	144	ALA	LBR
2.40.10.10	3.4.22.28	2zu1B01	145	GLY	ASR
2.40.10.10	3.4.22.28	2zu1B01	147	ALA	ASR
2.40.10.10	3.4.22.28	2zu1B01	155	GLY	ASR
2.40.10.10	3.4.22.28	2zu1B01	160	ILE	CSR
2.40.10.10	3.4.22.28	2zu1B01	161	HIS	LBR
2.40.10.10	3.4.22.28	2zu1B01	162	VAL	ASR
2.40.10.10	3.4.22.28	2zu1B01	163	GLY	LBR
2.40.10.10	3.4.22.28	2zu1B01	165	ASN	LBR
2.40.10.10	3.4.22.28	2zu1B01	167	HIS	ASR
2.40.10.10	3.4.22.28	2zu1B01	170	PHE	LBR
2.40.10.10	3.4.22.29	2zu1B01	117	GLY	CSR
2.40.10.10	3.4.22.29	2zu1B01	145	GLY	ASR
2.40.10.10	3.4.22.29	2zu1B01	146	GLN	CSR
2.40.10.10	3.4.22.29	2zu1B01	147	ALA	ASR
2.40.10.10	3.4.22.29	2zu1B01	153	SER	ASR
2.40.10.10	3.4.22.29	2zu1B01	155	GLY	ASR
2.40.10.10	3.4.22.29	2zu1B01	167	HIS	ASR
2.40.10.10	3.6.1.15	2zu1B01	127	LEU	ASR
2.40.10.10	3.6.1.15	2zu1B01	144	ALA	LBR
2.40.10.10	3.6.1.15	2zu1B01	147	ALA	ASR
2.40.10.10	3.6.1.15	2zu1B01	153	SER	ASR
2.40.10.10	3.6.1.15	2zu1B01	155	GLY	ASR
2.40.10.10	3.6.1.15	2zu1B01	157	VAL	CSR
2.40.10.10	3.6.1.15	2zu1B01	162	VAL	ASR
2.40.10.10	3.6.1.15	2zu1B01	163	GLY	LBR
2.40.10.10	3.6.1.15	2zu1B01	165	ASN	LBR
2.40.10.10	3.6.1.15	2zu1B01	167	HIS	ASR
2.40.10.10	3.6.1.15	2zu1B01	170	PHE	LBR
2.40.20.10	3.4.21.5	2pf2A00	66	CYS	CSR
2.40.20.10	3.4.21.5	2pf2A00	84	GLY	CSR
2.40.20.10	3.4.21.5	2pf2A00	113	ASN	CSR
2.40.20.10	3.4.21.5	2pf2A00	114	PHE	CSR
2.40.20.10	3.4.21.5	2pf2A00	124	GLY	CSR
2.40.20.10	3.4.21.7	1pmkB00	31	HIS	CSR
2.40.20.10	3.4.21.7	1pmkB00	49	ASN	CSR
2.40.20.10	3.4.21.7	1pmkB00	61	PRO	CSR
2.40.20.10	3.4.21.7	1pmkB00	65	THR	CSR
2.40.20.10	3.4.21.68	1pmlC00	10	ARG	CSR
2.40.20.10	3.4.21.68	1pmlC00	14	SER	CSR
2.40.20.10	3.4.21.68	1pmlC00	30	LEU	CSR
2.40.20.10	3.4.21.68	1pmlC00	45	GLY	CSR
2.40.20.10	3.4.21.68	1pmlC00	47	GLY	CSR
2.40.30.10	1.6.2.2	1umkA01	92	PRO	LBR
2.40.30.10	1.6.2.2	1umkA01	94	THR	LBR
2.40.30.10	1.6.2.2	1umkA01	95	PRO	CSR
2.40.30.10	1.6.2.2	1umkA01	110	LYS	LBR
2.40.30.10	1.6.2.2	1umkA01	112	TYR	LBR
2.40.30.10	1.6.2.2	1umkA01	113	PHE	LBR
2.40.30.10	1.6.2.2	1umkA01	119	LYS	LBR
2.40.30.10	1.6.2.2	1umkA01	120	PHE	LBR
2.40.30.10	1.6.2.2	1umkA01	125	LYS	LBR
2.40.30.10	1.6.2.4	1ja1B02	292	LEU	CSR
2.40.30.10	1.6.2.4	1ja1B02	298	ARG	LBR
2.40.30.10	1.6.2.4	1ja1B02	302	HIS	CSR
2.40.30.10	1.6.2.4	1ja1B02	304	GLU	CSR
2.40.30.10	1.6.2.4	1ja1B02	455	TYR	LBR
2.40.30.10	1.6.2.4	1ja1B02	472	CYS	LBR
2.40.30.10	1.6.2.4	1ja1B02	473	ALA	LBR
2.40.30.10	1.6.2.4	1ja1B02	474	VAL	LBR
2.40.30.10	1.6.2.4	1ja1B02	478	TYR	LBR
2.40.30.10	1.6.2.4	1ja1B02	491	THR	LBR
2.40.30.10	1.6.2.4	1ja1B02	518	PHE	CSR
2.40.30.10	1.7.1.1	2cndA01	27	VAL	CSR
2.40.30.10	1.7.1.1	2cndA01	63	ALA	LBR
2.40.30.10	1.7.1.1	2cndA01	84	PHE	LBR
2.40.30.10	1.7.1.1	2cndA01	88	HIS	LBR
2.40.30.10	1.7.1.1	2cndA01	91	PHE	LBR
2.40.30.10	1.7.1.1	2cndA01	96	LEU	LBR
2.40.30.10	1.7.1.1	2cndA01	97	MET	LBR
2.40.30.10	1.7.1.1	2cndA01	99	GLN	CSR
2.40.30.10	1.8.1.2	1ddiA01	248	THR	CSR
2.40.30.10	1.8.1.2	1ddiA01	258	HIS	CSR
2.40.30.10	1.8.1.2	1ddiA01	402	HIS	CSR
2.40.30.10	1.8.1.2	1ddiA01	408	VAL	LBR
2.40.30.10	1.8.1.2	1ddiA01	417	ARG	CSR
2.40.30.10	1.8.1.2	1ddiA01	421	ALA	LBR
2.40.30.10	1.8.1.2	1ddiA01	422	SER	LBR
2.40.30.10	1.14.12.17	1cqxB02	151	TRP	CSR
2.40.30.10	1.14.12.17	1cqxB02	157	PHE	CSR
2.40.30.10	1.14.12.17	1cqxB02	190	TYR	LBR
2.40.30.10	1.14.12.17	1cqxB02	207	GLN	LBR
2.40.30.10	1.14.12.17	1cqxB02	220	ARG	CSR
2.40.30.10	1.14.12.17	1cqxB02	222	SER	LBR
2.40.30.10	1.14.12.17	1cqxB02	226	GLU	LBR
2.40.30.10	1.14.13.39	1tllB03	3002	ASN	CSR
2.40.30.10	1.14.13.39	1tllB03	3174	TYR	LBR
2.40.30.10	1.14.13.39	1tllB03	3178	SER	CSR
2.40.30.10	1.14.13.39	1tllB03	3193	ALA	LBR
2.40.30.10	1.14.13.39	1tllB03	3197	TYR	LBR
2.40.30.10	1.14.13.39	1tllB03	3210	VAL	LBR
2.40.30.10	1.14.13.39	1tllB03	3211	CYS	LBR
2.40.30.10	1.14.13.39	1tllB03	3234	PHE	CSR
2.40.30.10	1.18.1.2	2rc5B01	47	GLU	LBR
2.40.30.10	1.18.1.2	2rc5B01	48	ALA	LBR
2.40.30.10	1.18.1.2	2rc5B01	49	LEU	LBR
2.40.30.10	1.18.1.2	2rc5B01	69	SER	LBR
2.40.30.10	1.18.1.2	2rc5B01	95	LEU	LBR
2.40.30.10	1.18.1.2	2rc5B01	115	ILE	LBR
2.40.30.10	1.18.1.2	2rc5B01	117	LYS	LBR
2.40.30.10	1.18.1.2	2rc5B01	118	ARG	LBR
2.40.30.10	1.18.1.2	2rc5B01	119	ASP	LBR
2.40.30.10	1.18.1.2	2rc5B01	121	ILE	LBR
2.40.30.10	1.18.1.2	2rc5B01	122	TYR	LBR
2.40.30.10	1.18.1.2	2rc5B01	134	CYS	LBR
2.40.30.20	2.5.1.9	1kzlA02	102	HIS	ASR
2.40.30.20	2.5.1.9	1kzlA02	103	VAL	LBR
2.40.30.20	2.5.1.9	1kzlA02	146	SER	ASR
2.40.30.20	2.5.1.9	1kzlA02	147	LEU	LBR
2.40.30.20	2.5.1.9	1kzlA02	148	THR	LBR
2.40.30.20	2.5.1.9	1kzlA02	165	THR	LBR
2.40.30.20	2.5.1.9	1kzlA02	181	ASN	CSR
2.40.30.20	3.6.3.14	2r9vA01	29	GLY	CSR
2.40.30.20	3.6.3.14	2r9vA01	36	ASP	CSR
2.40.30.20	3.6.3.14	2r9vA01	43	GLY	CSR
2.40.30.20	3.6.3.14	2r9vA01	44	LEU	CSR
2.40.30.20	3.6.3.14	2r9vA01	51	GLU	CSR
2.40.30.30	2.7.1.26	1p4mA00	25	ARG	LBR
2.40.30.30	2.7.1.26	1p4mA00	28	LYS	LBR
2.40.30.30	2.7.1.26	1p4mA00	34	THR	LBR
2.40.30.30	2.7.1.26	1p4mA00	35	ALA	CSR
2.40.30.30	2.7.1.26	1p4mA00	36	ASN	LBR
2.40.30.30	2.7.1.26	1p4mA00	54	TYR	CSR
2.40.30.30	2.7.1.26	1p4mA00	75	ASN	LBR
2.40.30.30	2.7.1.26	1p4mA00	88	HIS	LBR
2.40.30.30	2.7.1.26	1p4mA00	98	TYR	LBR
2.40.30.30	2.7.1.26	1p4mA00	111	ARG	LBR
2.40.30.30	2.7.1.26	1p4mA00	116	PHE	LBR
2.40.30.30	2.7.1.26	1p4mA00	122	LEU	LBR
2.40.30.30	2.7.1.161	2vbvB01	27	TYR	CSR
2.40.30.30	2.7.1.161	2vbvB01	39	PRO	CSR
2.40.30.30	2.7.1.161	2vbvB01	43	THR	CSR
2.40.30.30	2.7.1.161	2vbvB01	44	LEU	CSR
2.40.30.30	2.7.1.161	2vbvB01	45	ASN	CSR
2.40.30.30	2.7.1.161	2vbvB01	114	LEU	CSR
2.40.37.10	4.1.1.17	7odcA01	331	TYR	LBR
2.40.37.10	4.1.1.17	7odcA01	332	ASP	LBR
2.40.37.10	4.1.1.17	7odcA01	358	PRO	CSR
2.40.37.10	4.1.1.17	7odcA01	397	PHE	LBR
2.40.37.10	4.1.1.17	7odcA01	398	ASN	CSR
2.40.37.10	4.1.1.17	7odcA01	399	GLY	CSR
2.40.37.10	4.1.1.20	2o0tD01	336	ASP	CSR
2.40.37.10	4.1.1.20	2o0tD01	344	ARG	LBR
2.40.37.10	4.1.1.20	2o0tD01	348	TYR	LBR
2.40.37.10	4.1.1.20	2o0tD01	376	GLU	LBR
2.40.37.10	4.1.1.20	2o0tD01	404	ALA	CSR
2.40.37.10	4.1.1.20	2o0tD01	413	TYR	CSR
2.40.37.10	5.1.1.1	2vd8B01	270	TYR	ASR
2.40.37.10	5.1.1.1	2vd8B01	288	GLY	CSR
2.40.37.10	5.1.1.1	2vd8B01	289	TYR	LBR
2.40.37.10	5.1.1.1	2vd8B01	292	GLY	CSR
2.40.37.10	5.1.1.1	2vd8B01	317	MET	LBR
2.40.37.10	5.1.1.1	2vd8B01	360	GLU	CSR
2.40.40.20	1.2.1.2	2iv2X04	573	TYR	CSR
2.40.40.20	1.2.1.2	2iv2X04	581	ARG	LBR
2.40.40.20	1.2.1.2	2iv2X04	582	GLU	LBR
2.40.40.20	1.2.1.2	2iv2X04	586	TYR	LBR
2.40.40.20	1.2.1.2	2iv2X04	587	SER	LBR
2.40.40.20	1.2.1.2	2iv2X04	588	CYS	LBR
2.40.40.20	1.2.1.2	2iv2X04	591	MET	CSR
2.40.40.20	1.2.1.2	2iv2X04	654	TYR	LBR
2.40.40.20	1.7.2.3	4dmrA04	626	GLU	CSR
2.40.40.20	1.7.2.3	4dmrA04	658	ARG	CSR
2.40.40.20	1.7.2.3	4dmrA04	676	ALA	CSR
2.40.40.20	1.7.2.3	4dmrA04	699	GLY	CSR
2.40.40.20	1.7.2.3	4dmrA04	748	LEU	CSR
2.40.40.20	1.7.2.3	4dmrA04	749	ALA	CSR
2.40.40.20	1.7.2.3	4dmrA04	763	LYS	CSR
2.40.40.20	1.7.99.4	2v45A04	613	LEU	CSR
2.40.40.20	1.7.99.4	2v45A04	616	MET	CSR
2.40.40.20	1.7.99.4	2v45A04	617	ARG	CSR
2.40.40.20	1.7.99.4	2v45A04	622	TRP	CSR
2.40.40.20	1.7.99.4	2v45A04	649	ASP	CSR
2.40.40.20	1.7.99.4	2v45A04	697	ASN	CSR
2.40.40.20	1.7.99.4	2v45A04	706	PRO	CSR
2.40.40.20	1.7.99.4	2v45A04	708	SER	CSR
2.40.40.20	4.1.1.11	1pqhB00	9	LYS	LBR
2.40.40.20	4.1.1.11	1pqhB00	11	HIS	CSR
2.40.40.20	4.1.1.11	1pqhB00	24	GLY	LBR
2.40.40.20	4.1.1.11	1pqhB00	25	THR	ASR
2.40.40.20	4.1.1.11	1pqhB00	57	THR	LBR
2.40.40.20	4.1.1.11	1pqhB00	58	TYR	ASR
2.40.40.20	4.1.1.11	1pqhB00	86	ILE	CSR
2.40.50.100	2.3.1.12	1fycA00	15	PRO	CSR
2.40.50.100	2.3.1.12	1fycA00	47	GLU	CSR
2.40.50.100	2.3.1.12	1fycA00	49	ASP	CSR
2.40.50.100	2.3.1.12	1fycA00	50	LYS	CSR
2.40.50.100	2.3.1.61	1ghkA00	7	PRO	CSR
2.40.50.100	2.3.1.61	1ghkA00	11	GLU	CSR
2.40.50.100	2.3.1.61	1ghkA00	12	SER	CSR
2.40.50.100	2.3.1.61	1ghkA00	23	LYS	CSR
2.40.50.100	2.7.7.6	3eqlM05	643	VAL	CSR
2.40.50.100	2.7.7.6	3eqlM05	652	GLY	CSR
2.40.50.100	3.6.3.19	2r6gB02	270	VAL	CSR
2.40.50.100	3.6.3.19	2r6gB02	283	LEU	CSR
2.40.50.100	3.6.3.19	2r6gB02	353	HIS	CSR
2.40.50.100	3.6.3.19	2r6gB02	355	PHE	CSR
2.40.50.140	2.7.7.8	1sroA00	34	HIS	CSR
2.40.50.140	2.7.7.8	1sroA00	36	SER	CSR
2.40.50.140	2.7.7.8	1sroA00	53	GLY	CSR
2.40.50.140	2.7.7.8	1sroA00	58	VAL	CSR
2.40.50.140	2.7.7.50	1p16B02	248	ASN	CSR
2.40.50.140	2.7.7.50	1p16B02	251	ASP	ASR
2.40.50.140	2.7.7.50	1p16B02	282	PRO	CSR
2.40.50.140	2.7.7.50	1p16B02	325	GLU	CSR
2.40.50.140	2.7.7.50	1p16B02	326	CYS	CSR
2.40.50.140	2.7.7.50	1p16B02	345	LYS	ASR
2.40.50.140	2.7.7.50	1p16B02	349	ASN	ASR
2.40.50.140	6.1.1.6	3bjuD01	80	ARG	CSR
2.40.50.140	6.1.1.6	3bjuD01	131	ARG	CSR
2.40.50.140	6.1.1.6	3bjuD01	180	ASP	CSR
2.40.50.140	6.1.1.6	3bjuD01	186	GLY	CSR
2.40.50.140	6.1.1.6	3bjuD01	208	PRO	CSR
2.40.50.140	6.1.1.6	3bjuD01	214	PRO	CSR
2.40.50.140	6.1.1.10	1mkhA00	59	ASN	CSR
2.40.50.140	6.1.1.10	1mkhA00	67	ASN	CSR
2.40.50.140	6.1.1.10	1mkhA00	81	MET	CSR
2.40.50.140	6.1.1.10	1mkhA00	103	GLY	CSR
2.40.50.140	6.1.1.12	1eovA01	113	ALA	CSR
2.40.50.140	6.1.1.12	1eovA01	114	ARG	CSR
2.40.50.140	6.1.1.12	1eovA01	119	ARG	CSR
2.40.50.140	6.1.1.12	1eovA01	127	PHE	CSR
2.40.50.140	6.1.1.12	1eovA01	131	ARG	CSR
2.40.50.140	6.1.1.12	1eovA01	132	GLN	CSR
2.40.50.140	6.1.1.12	1eovA01	163	GLU	CSR
2.40.50.140	6.1.1.20	2iy5B02	78	ALA	CSR
2.40.50.140	6.1.1.20	2iy5B02	80	ASN	CSR
2.40.50.140	6.1.1.20	2iy5B02	113	SER	CSR
2.40.50.140	6.1.1.20	2iy5B02	116	MET	CSR
2.40.50.140	6.1.1.20	2iy5B02	118	LEU	CSR
2.40.50.140	6.1.1.20	2iy5B02	122	GLU	CSR
2.40.50.140	6.1.1.22	1x56A01	24	TRP	CSR
2.40.50.140	6.1.1.22	1x56A01	29	MET	CSR
2.40.50.140	6.1.1.22	1x56A01	36	PHE	CSR
2.40.50.140	6.1.1.22	1x56A01	41	ASP	CSR
2.40.50.140	6.1.1.22	1x56A01	42	SER	CSR
2.40.50.140	6.1.1.22	1x56A01	89	GLU	CSR
2.40.50.140	6.5.1.1	1x9nA04	758	ASP	CSR
2.40.50.140	6.5.1.1	1x9nA04	769	GLY	CSR
2.40.50.140	6.5.1.1	1x9nA04	867	GLY	CSR
2.40.50.140	6.5.1.1	1x9nA04	871	ARG	CSR
2.40.50.140	6.5.1.1	1x9nA04	872	PHE	CSR
2.40.50.140	6.5.1.1	1x9nA04	879	ARG	CSR
2.40.50.140	6.5.1.1	1x9nA04	881	ASP	CSR
2.40.50.140	6.5.1.2	1v9pB04	2333	GLY	CSR
2.40.50.140	6.5.1.2	1v9pB04	2336	GLY	CSR
2.40.50.140	6.5.1.2	1v9pB04	2385	ILE	CSR
2.40.50.140	6.5.1.2	1v9pB04	2386	PRO	CSR
2.40.70.10	2.7.7.7	2hs1B00	108	ARG	LBR
2.40.70.10	2.7.7.7	2hs1B00	109	PRO	CSR
2.40.70.10	2.7.7.7	2hs1B00	123	LEU	LBR
2.40.70.10	2.7.7.7	2hs1B00	128	ALA	LBR
2.40.70.10	2.7.7.7	2hs1B00	129	ASP	LBR
2.40.70.10	2.7.7.7	2hs1B00	130	ASP	LBR
2.40.70.10	2.7.7.7	2hs1B00	145	LYS	LBR
2.40.70.10	2.7.7.7	2hs1B00	148	GLY	LBR
2.40.70.10	2.7.7.7	2hs1B00	150	ILE	LBR
2.40.70.10	2.7.7.7	2hs1B00	174	THR	LBR
2.40.70.10	2.7.7.7	2hs1B00	176	LEU	LBR
2.40.70.10	2.7.7.7	2hs1B00	187	ARG	LBR
2.40.70.10	2.7.7.7	2hs1B00	188	ASN	LBR
2.40.70.10	2.7.7.49	2hahA00	11	GLU	LBR
2.40.70.10	2.7.7.49	2hahA00	13	ARG	LBR
2.40.70.10	2.7.7.49	2hahA00	15	GLU	LBR
2.40.70.10	2.7.7.49	2hahA00	28	LEU	LBR
2.40.70.10	2.7.7.49	2hahA00	33	ALA	LBR
2.40.70.10	2.7.7.49	2hahA00	34	ASP	LBR
2.40.70.10	2.7.7.49	2hahA00	56	ILE	LBR
2.40.70.10	2.7.7.49	2hahA00	57	GLY	LBR
2.40.70.10	2.7.7.49	2hahA00	59	ILE	LBR
2.40.70.10	2.7.7.49	2hahA00	98	PRO	LBR
2.40.70.10	2.7.7.49	2hahA00	104	ARG	LBR
2.40.70.10	2.7.7.49	2hahA00	105	ASP	LBR
2.40.70.10	3.1.26.13	2hahA00	10	LEU	CSR
2.40.70.10	3.1.26.13	2hahA00	11	GLU	LBR
2.40.70.10	3.1.26.13	2hahA00	13	ARG	LBR
2.40.70.10	3.1.26.13	2hahA00	15	GLU	LBR
2.40.70.10	3.1.26.13	2hahA00	29	LEU	CSR
2.40.70.10	3.1.26.13	2hahA00	33	ALA	LBR
2.40.70.10	3.1.26.13	2hahA00	34	ASP	LBR
2.40.70.10	3.1.26.13	2hahA00	35	ILE	LBR
2.40.70.10	3.1.26.13	2hahA00	54	GLN	LBR
2.40.70.10	3.1.26.13	2hahA00	56	ILE	LBR
2.40.70.10	3.1.26.13	2hahA00	57	GLY	LBR
2.40.70.10	3.1.26.13	2hahA00	59	ILE	LBR
2.40.70.10	3.1.26.13	2hahA00	90	CYS	LBR
2.40.70.10	3.1.26.13	2hahA00	104	ARG	LBR
2.40.70.10	3.1.26.13	2hahA00	105	ASP	LBR
2.40.70.10	3.4.23.1	3psgA01	13	GLU	LBR
2.40.70.10	3.4.23.1	3psgA01	22	THR	CSR
2.40.70.10	3.4.23.1	3psgA01	37	ASN	LBR
2.40.70.10	3.4.23.1	3psgA01	50	CYS	CSR
2.40.70.10	3.4.23.1	3psgA01	74	THR	LBR
2.40.70.10	3.4.23.1	3psgA01	75	TYR	LBR
2.40.70.10	3.4.23.1	3psgA01	105	GLU	LBR
2.40.70.10	3.4.23.1	3psgA01	107	GLU	LBR
2.40.70.10	3.4.23.1	3psgA01	111	PHE	LBR
2.40.70.10	3.4.23.1	3psgA01	117	PHE	LBR
2.40.70.10	3.4.23.1	3psgA01	120	ILE	LBR
2.40.70.10	3.4.23.3	1avfA01	16	GLY	CSR
2.40.70.10	3.4.23.3	1avfA01	24	PRO	CSR
2.40.70.10	3.4.23.3	1avfA01	45	CYS	CSR
2.40.70.10	3.4.23.3	1avfA01	77	SER	CSR
2.40.70.10	3.4.23.5	1lywH00	117	GLU	CSR
2.40.70.10	3.4.23.5	1lywH00	129	ALA	CSR
2.40.70.10	3.4.23.5	1lywH00	206	TRP	CSR
2.40.70.10	3.4.23.5	1lywH00	231	ASP	ASR
2.40.70.10	3.4.23.5	1lywH00	235	SER	LBR
2.40.70.10	3.4.23.5	1lywH00	304	SER	CSR
2.40.70.10	3.4.23.5	1lywH00	311	ILE	LBR
2.40.70.10	3.4.23.5	1lywH00	320	ILE	LBR
2.40.70.10	3.4.23.15	2renA01	18	THR	LBR
2.40.70.10	3.4.23.15	2renA01	19	GLN	LBR
2.40.70.10	3.4.23.15	2renA01	36	VAL	LBR
2.40.70.10	3.4.23.15	2renA01	38	ASP	ASR
2.40.70.10	3.4.23.15	2renA01	39	THR	CSR
2.40.70.10	3.4.23.15	2renA01	42	SER	LBR
2.40.70.10	3.4.23.15	2renA01	49	SER	CSR
2.40.70.10	3.4.23.15	2renA01	84	SER	LBR
2.40.70.10	3.4.23.15	2renA01	101	GLY	CSR
2.40.70.10	3.4.23.15	2renA01	114	MET	LBR
2.40.70.10	3.4.23.15	2renA01	115	PRO	LBR
2.40.70.10	3.4.23.15	2renA01	118	PRO	LBR
2.40.70.10	3.4.23.15	2renA01	121	LEU	LBR
2.40.70.10	3.4.23.15	2renA01	124	PHE	LBR
2.40.70.10	3.4.23.15	2renA01	127	VAL	LBR
2.40.70.10	3.4.23.16	2hs1B00	108	ARG	LBR
2.40.70.10	3.4.23.16	2hs1B00	109	PRO	CSR
2.40.70.10	3.4.23.16	2hs1B00	128	ALA	LBR
2.40.70.10	3.4.23.16	2hs1B00	140	GLY	LBR
2.40.70.10	3.4.23.16	2hs1B00	145	LYS	LBR
2.40.70.10	3.4.23.16	2hs1B00	146	MET	LBR
2.40.70.10	3.4.23.16	2hs1B00	147	ILE	LBR
2.40.70.10	3.4.23.16	2hs1B00	150	ILE	LBR
2.40.70.10	3.4.23.16	2hs1B00	176	LEU	LBR
2.40.70.10	3.4.23.16	2hs1B00	187	ARG	LBR
2.40.70.10	3.4.23.21	6aprE01	10	ASP	CSR
2.40.70.10	3.4.23.21	6aprE01	16	GLU	LBR
2.40.70.10	3.4.23.21	6aprE01	33	ASP	LBR
2.40.70.10	3.4.23.21	6aprE01	39	SER	LBR
2.40.70.10	3.4.23.21	6aprE01	56	THR	CSR
2.40.70.10	3.4.23.21	6aprE01	76	SER	CSR
2.40.70.10	3.4.23.21	6aprE01	99	ILE	CSR
2.40.70.10	3.4.23.21	6aprE01	104	ILE	LBR
2.40.70.10	3.4.23.21	6aprE01	122	LEU	LBR
2.40.70.10	3.4.23.21	6aprE01	124	GLY	CSR
2.40.70.10	3.4.23.21	6aprE01	144	ILE	CSR
2.40.70.10	3.4.23.21	6aprE01	156	VAL	CSR
2.40.70.10	3.4.23.24	1j71A01	13	SER	LBR
2.40.70.10	3.4.23.24	1j71A01	22	SER	CSR
2.40.70.10	3.4.23.24	1j71A01	30	VAL	LBR
2.40.70.10	3.4.23.24	1j71A01	36	SER	LBR
2.40.70.10	3.4.23.24	1j71A01	39	TRP	LBR
2.40.70.10	3.4.23.24	1j71A01	64	THR	CSR
2.40.70.10	3.4.23.24	1j71A01	111	PHE	CSR
2.40.70.10	3.4.23.24	1j71A01	118	SER	CSR
2.40.70.10	3.4.23.24	1j71A01	148	GLN	CSR
2.40.70.10	3.4.23.24	1j71A01	154	ASN	CSR
2.40.110.10	1.3.3.6	2ddhA02	145	THR	LBR
2.40.110.10	1.3.3.6	2ddhA02	163	PHE	CSR
2.40.110.10	1.3.3.6	2ddhA02	178	GLY	LBR
2.40.110.10	1.3.3.6	2ddhA02	210	ARG	CSR
2.40.110.10	1.3.3.6	2ddhA02	227	GLY	CSR
2.40.110.10	1.3.3.6	2ddhA02	237	ASN	CSR
2.40.240.10	6.1.1.18	1nylA01	400	TYR	CSR
2.40.240.10	6.1.1.18	1nylA01	455	VAL	CSR
2.40.240.10	6.1.1.18	1nylA01	457	HIS	CSR
2.40.240.10	6.1.1.18	1nylA01	460	SER	CSR
2.40.240.10	6.1.1.18	1nylA01	462	ALA	CSR
2.60.40.10	2.3.2.13	1qrkA01	79	GLY	CSR
2.60.40.10	2.3.2.13	1qrkA01	90	ARG	CSR
2.60.40.10	2.3.2.13	1qrkA01	106	GLY	ASR
2.60.40.10	2.3.2.13	1qrkA01	130	TRP	CSR
2.60.40.10	2.3.2.13	1qrkA01	142	VAL	CSR
2.60.40.10	2.3.2.13	1qrkA01	182	ILE	CSR
2.60.40.10	2.4.1.18	1m7xC01	126	GLY	CSR
2.60.40.10	2.4.1.18	1m7xC01	145	PRO	CSR
2.60.40.10	2.4.1.18	1m7xC01	147	ALA	CSR
2.60.40.10	2.4.1.18	1m7xC01	204	ASP	CSR
2.60.40.10	2.4.1.18	1m7xC01	205	PRO	CSR
2.60.40.10	2.4.1.19	3bmwA04	591	ASN	CSR
2.60.40.10	2.4.1.19	3bmwA04	598	GLY	CSR
2.60.40.10	2.4.1.19	3bmwA04	611	GLY	CSR
2.60.40.10	2.4.1.19	3bmwA04	633	TRP	CSR
2.60.40.10	2.4.1.19	3bmwA04	659	TRP	LBR
2.60.40.10	2.4.1.19	3bmwA04	664	ASN	LBR
2.60.40.10	2.7.10.1	2dtgE04	503	PHE	CSR
2.60.40.10	2.7.10.1	2dtgE04	516	THR	CSR
2.60.40.10	2.7.10.1	2dtgE04	518	PHE	CSR
2.60.40.10	2.7.10.1	2dtgE04	566	VAL	CSR
2.60.40.10	2.7.10.1	2dtgE04	568	THR	CSR
2.60.40.10	2.7.11.1	1g1cB00	75	ALA	CSR
2.60.40.10	2.7.11.1	1g1cB00	83	ASN	CSR
2.60.40.10	2.7.11.1	1g1cB00	86	GLY	CSR
2.60.40.10	2.7.11.18	2cqvA00	8	PRO	CSR
2.60.40.10	2.7.11.18	2cqvA00	19	VAL	CSR
2.60.40.10	2.7.11.18	2cqvA00	33	GLY	CSR
2.60.40.10	2.7.11.18	2cqvA00	41	TRP	CSR
2.60.40.10	2.7.11.18	2cqvA00	78	TYR	CSR
2.60.40.10	3.2.1.4	1clcA01	39	VAL	CSR
2.60.40.10	3.2.1.4	1clcA01	56	LEU	CSR
2.60.40.10	3.2.1.4	1clcA01	69	ALA	CSR
2.60.40.10	3.2.1.4	1clcA01	77	THR	CSR
2.60.40.10	3.2.1.4	1clcA01	116	GLU	CSR
2.60.40.10	3.2.1.4	1clcA01	123	VAL	CSR
2.60.40.150	2.7.11.13	2uzpA00	161	LEU	CSR
2.60.40.150	2.7.11.13	2uzpA00	163	LEU	CSR
2.60.40.150	2.7.11.13	2uzpA00	211	LYS	CSR
2.60.40.150	2.7.11.13	2uzpA00	216	LYS	CSR
2.60.40.150	2.7.11.13	2uzpA00	281	GLU	CSR
2.60.40.150	3.1.1.4	1rlwA00	37	ASP	CSR
2.60.40.150	3.1.1.4	1rlwA00	40	ASP	LBR
2.60.40.150	3.1.1.4	1rlwA00	43	ASP	LBR
2.60.40.150	3.1.1.4	1rlwA00	60	THR	CSR
2.60.40.150	3.1.1.4	1rlwA00	85	ASN	CSR
2.60.40.150	3.1.1.4	1rlwA00	86	VAL	CSR
2.60.40.150	3.1.1.4	1rlwA00	88	GLU	CSR
2.60.40.150	3.1.1.4	1rlwA00	94	ALA	LBR
2.60.40.150	3.1.4.11	1qasB03	662	GLY	CSR
2.60.40.150	3.1.4.11	1qasB03	666	ASP	CSR
2.60.40.150	3.1.4.11	1qasB03	695	PRO	CSR
2.60.40.150	3.1.4.11	1qasB03	697	LEU	CSR
2.60.40.150	3.1.4.11	1qasB03	707	TYR	LBR
2.60.40.150	3.1.4.11	1qasB03	735	LEU	CSR
2.60.40.320	3.2.1.23	3fn9D02	221	PRO	LBR
2.60.40.320	3.2.1.23	3fn9D02	271	LYS	CSR
2.60.40.320	3.2.1.23	3fn9D02	273	PRO	LBR
2.60.40.320	3.2.1.23	3fn9D02	276	TYR	CSR
2.60.40.320	3.2.1.23	3fn9D02	277	LYS	LBR
2.60.40.320	3.2.1.23	3fn9D02	295	PRO	LBR
2.60.40.320	3.2.1.23	3fn9D02	296	LEU	CSR
2.60.40.320	3.2.1.23	3fn9D02	298	VAL	LBR
2.60.40.420	1.7.2.1	2nrdA02	186	PRO	CSR
2.60.40.420	1.7.2.1	2nrdA02	220	PHE	CSR
2.60.40.420	1.7.2.1	2nrdA02	221	ASN	CSR
2.60.40.420	1.7.2.1	2nrdA02	222	GLY	CSR
2.60.40.420	1.7.2.1	2nrdA02	224	VAL	CSR
2.60.40.420	1.7.2.1	2nrdA02	255	HIS	ASR
2.60.40.420	1.7.2.1	2nrdA02	257	ILE	LBR
2.60.40.420	1.7.2.1	2nrdA02	293	TYR	CSR
2.60.40.420	1.7.2.1	2nrdA02	311	ALA	LBR
2.60.40.420	1.7.99.6	1fwxD02	487	VAL	CSR
2.60.40.420	1.7.99.6	1fwxD02	489	VAL	CSR
2.60.40.420	1.7.99.6	1fwxD02	495	ALA	CSR
2.60.40.420	1.7.99.6	1fwxD02	544	THR	CSR
2.60.40.420	1.7.99.6	1fwxD02	563	TRP	LBR
2.60.40.420	1.7.99.6	1fwxD02	565	CYS	LBR
2.60.40.420	1.7.99.6	1fwxD02	569	HIS	LBR
2.60.40.420	1.7.99.6	1fwxD02	572	MET	LBR
2.60.40.420	1.9.3.1	3dtuD02	142	GLN	ASR
2.60.40.420	1.9.3.1	3dtuD02	143	TRP	ASR
2.60.40.420	1.9.3.1	3dtuD02	215	VAL	CSR
2.60.40.420	1.9.3.1	3dtuD02	227	LYS	CSR
2.60.40.420	1.9.3.1	3dtuD02	254	GLU	ASR
2.60.40.420	1.9.3.1	3dtuD02	256	CYS	ASR
2.60.40.420	1.9.3.1	3dtuD02	257	GLY	CSR
2.60.40.420	1.10.3.2	2q9oB03	428	SER	LBR
2.60.40.420	1.10.3.2	2q9oB03	431	HIS	ASR
2.60.40.420	1.10.3.2	2q9oB03	457	PHE	CSR
2.60.40.420	1.10.3.2	2q9oB03	459	PHE	CSR
2.60.40.420	1.10.3.2	2q9oB03	460	ASP	CSR
2.60.40.420	1.10.3.2	2q9oB03	473	PRO	CSR
2.60.40.420	1.10.3.2	2q9oB03	502	HIS	ASR
2.60.40.420	1.10.3.2	2q9oB03	503	CYS	ASR
2.60.40.420	1.10.3.2	2q9oB03	504	HIS	ASR
2.60.40.420	1.10.3.2	2q9oB03	508	HIS	ASR
2.60.40.420	1.10.3.2	2q9oB03	511	GLY	CSR
2.60.40.420	1.16.3.1	1kcwA05	761	LYS	CSR
2.60.40.420	1.16.3.1	1kcwA05	762	LYS	CSR
2.60.40.420	1.16.3.1	1kcwA05	769	THR	CSR
2.60.40.420	1.16.3.1	1kcwA05	770	ASP	CSR
2.60.40.420	1.16.3.1	1kcwA05	795	ALA	CSR
2.60.40.420	1.16.3.1	1kcwA05	813	TYR	ASR
2.60.40.420	1.16.3.1	1kcwA05	862	SER	ASR
2.60.40.420	1.16.3.1	1kcwA05	863	THR	ASR
2.60.40.420	1.16.3.1	1kcwA05	866	GLN	ASR
2.60.40.420	1.16.3.1	1kcwA05	868	LYS	LBR
2.60.40.420	1.16.3.1	1kcwA05	869	ASP	ASR
2.60.40.420	1.16.3.1	1kcwA05	873	GLY	CSR
2.60.40.1180	2.4.1.18	1m7xD03	625	GLY	CSR
2.60.40.1180	2.4.1.18	1m7xD03	665	TYR	CSR
2.60.40.1180	2.4.1.18	1m7xD03	682	ASP	CSR
2.60.40.1180	2.4.1.18	1m7xD03	686	TYR	CSR
2.60.40.1180	2.4.1.18	1m7xD03	688	GLY	CSR
2.60.40.1180	2.4.1.19	3bmwA02	406	TYR	CSR
2.60.40.1180	2.4.1.19	3bmwA02	415	ASN	CSR
2.60.40.1180	2.4.1.19	3bmwA02	417	ASP	CSR
2.60.40.1180	2.4.1.19	3bmwA02	422	GLU	CSR
2.60.40.1180	2.4.1.19	3bmwA02	426	GLY	CSR
2.60.40.1180	3.2.1.1	7taaA02	392	THR	LBR
2.60.40.1180	3.2.1.1	7taaA02	398	LYS	CSR
2.60.40.1180	3.2.1.1	7taaA02	399	GLY	CSR
2.60.40.1180	3.2.1.1	7taaA02	411	ASN	LBR
2.60.40.1180	3.2.1.1	7taaA02	432	GLN	CSR
2.60.40.1180	3.2.1.1	7taaA02	436	GLU	CSR
2.60.40.1180	3.2.1.1	7taaA02	449	GLY	CSR
2.60.40.1180	3.2.1.22	1t0oA02	342	TRP	CSR
2.60.40.1180	3.2.1.22	1t0oA02	344	GLY	CSR
2.60.40.1180	3.2.1.22	1t0oA02	346	SER	CSR
2.60.40.1180	3.2.1.22	1t0oA02	385	TRP	CSR
2.60.40.1180	3.2.1.22	1t0oA02	403	HIS	CSR
2.60.40.1180	3.2.1.24	1o7dC02	518	LEU	CSR
2.60.40.1180	3.2.1.24	1o7dC02	520	ARG	CSR
2.60.40.1180	3.2.1.24	1o7dC02	537	VAL	CSR
2.60.60.20	1.13.11.12	1ygeA01	46	SER	CSR
2.60.60.20	1.13.11.12	1ygeA01	96	ALA	CSR
2.60.60.20	1.13.11.12	1ygeA01	101	ASN	CSR
2.60.60.20	1.13.11.12	1ygeA01	106	GLU	CSR
2.60.60.20	1.13.11.12	1ygeA01	109	LEU	CSR
2.60.60.20	1.13.11.12	1ygeA01	155	PRO	CSR
2.60.60.20	3.1.1.3	1bu8A02	340	TYR	CSR
2.60.60.20	3.1.1.3	1bu8A02	400	PHE	CSR
2.60.60.20	3.1.1.3	1bu8A02	402	TRP	CSR
2.60.60.20	3.1.1.3	1bu8A02	433	CYS	CSR
2.60.120.10	1.13.11.53	1zrrA00	74	ASP	CSR
2.60.120.10	1.13.11.53	1zrrA00	104	ARG	CSR
2.60.120.10	1.13.11.53	1zrrA00	113	PHE	CSR
2.60.120.10	1.13.11.53	1zrrA00	142	PHE	CSR
2.60.120.10	1.13.11.53	1zrrA00	154	ARG	CSR
2.60.120.10	1.13.11.53	1zrrA00	161	GLY	CSR
2.60.120.10	1.13.11.53	1zrrA00	162	TRP	CSR
2.60.120.10	1.13.11.54	1zrrA00	74	ASP	CSR
2.60.120.10	1.13.11.54	1zrrA00	92	PHE	CSR
2.60.120.10	1.13.11.54	1zrrA00	113	PHE	CSR
2.60.120.10	1.13.11.54	1zrrA00	142	PHE	CSR
2.60.120.10	1.13.11.54	1zrrA00	154	ARG	CSR
2.60.120.10	1.13.11.54	1zrrA00	156	PHE	CSR
2.60.120.10	1.13.11.54	1zrrA00	161	GLY	CSR
2.60.120.10	1.13.11.54	1zrrA00	162	TRP	CSR
2.60.120.10	5.1.3.13	1upiA00	19	HIS	LBR
2.60.120.10	5.1.3.13	1upiA00	26	PHE	LBR
2.60.120.10	5.1.3.13	1upiA00	49	ASN	ASR
2.60.120.10	5.1.3.13	1upiA00	59	ARG	LBR
2.60.120.10	5.1.3.13	1upiA00	72	LYS	ASR
2.60.120.10	5.1.3.13	1upiA00	121	PHE	LBR
2.60.120.10	5.1.3.13	1upiA00	132	TYR	ASR
2.60.120.10	5.1.3.13	1upiA00	168	SER	CSR
2.60.120.10	5.1.3.13	1upiA00	171	ASP	ASR
2.60.120.10	5.3.1.8	1qwrB01	96	LYS	ASR
2.60.120.10	5.3.1.8	1qwrB01	98	HIS	ASR
2.60.120.10	5.3.1.8	1qwrB01	114	LYS	ASR
2.60.120.10	5.3.1.8	1qwrB01	127	ALA	CSR
2.60.120.10	5.3.1.8	1qwrB01	166	TYR	CSR
2.60.120.10	5.3.1.8	1qwrB01	167	VAL	CSR
2.60.120.10	5.3.1.8	1qwrB01	173	HIS	ASR
2.60.120.10	5.3.1.8	1qwrB01	175	LEU	ASR
2.60.120.10	5.3.1.8	1qwrB01	183	GLU	ASR
2.60.120.10	5.3.1.8	1qwrB01	193	ARG	ASR
2.60.120.10	5.3.1.9	1x82A00	37	GLU	CSR
2.60.120.10	5.3.1.9	1x82A00	39	ALA	CSR
2.60.120.10	5.3.1.9	1x82A00	54	VAL	LBR
2.60.120.10	5.3.1.9	1x82A00	95	ARG	CSR
2.60.120.10	5.3.1.9	1x82A00	99	TYR	LBR
2.60.120.10	5.3.1.9	1x82A00	126	THR	CSR
2.60.120.10	5.3.1.9	1x82A00	152	TYR	LBR
2.60.120.10	5.3.1.9	1x82A00	155	ASP	CSR
2.60.120.10	5.3.1.9	1x82A00	158	HIS	LBR
2.60.120.10	5.3.1.9	1x82A00	160	TYR	LBR
2.60.120.20	3.4.22.28	1qjy100	113	PHE	CSR
2.60.120.20	3.4.22.28	1qjy100	114	THR	CSR
2.60.120.20	3.4.22.28	1qjy100	117	ARG	CSR
2.60.120.20	3.4.22.28	1qjy100	123	THR	CSR
2.60.120.20	3.4.22.28	1qjy100	124	MET	CSR
2.60.120.20	3.4.22.28	1qjy100	144	TYR	CSR
2.60.120.20	3.4.22.28	1qjy100	223	THR	CSR
2.60.120.20	3.4.22.28	1qjy100	271	HIS	CSR
2.60.120.20	3.4.22.28	1qjy100	274	VAL	CSR
2.60.120.20	3.4.22.29	1qjy100	33	VAL	CSR
2.60.120.20	3.4.22.29	1qjy100	58	SER	CSR
2.60.120.20	3.4.22.29	1qjy100	113	PHE	CSR
2.60.120.20	3.4.22.29	1qjy100	114	THR	CSR
2.60.120.20	3.4.22.29	1qjy100	117	ARG	CSR
2.60.120.20	3.4.22.29	1qjy100	119	ASP	CSR
2.60.120.20	3.4.22.29	1qjy100	123	THR	CSR
2.60.120.20	3.4.22.29	1qjy100	141	GLN	CSR
2.60.120.20	3.4.22.29	1qjy100	147	PRO	CSR
2.60.120.20	3.4.22.29	1qjy100	166	ALA	CSR
2.60.120.20	3.4.22.29	1qjy100	167	SER	CSR
2.60.120.20	3.4.22.29	1qjy100	195	ASP	CSR
2.60.120.20	3.4.22.46	1qqp300	15	VAL	CSR
2.60.120.20	3.4.22.46	1qqp300	16	THR	CSR
2.60.120.20	3.4.22.46	1qqp300	22	ALA	CSR
2.60.120.20	3.4.22.46	1qqp300	23	ASP	CSR
2.60.120.20	3.4.22.46	1qqp300	29	VAL	CSR
2.60.120.20	3.4.22.46	1qqp300	31	ASN	CSR
2.60.120.20	3.4.22.46	1qqp300	47	VAL	CSR
2.60.120.20	3.4.22.46	1qqp300	55	LEU	CSR
2.60.120.180	3.2.1.8	2vg9A00	54	LEU	LBR
2.60.120.180	3.2.1.8	2vg9A00	56	ARG	LBR
2.60.120.180	3.2.1.8	2vg9A00	58	GLY	CSR
2.60.120.180	3.2.1.8	2vg9A00	97	GLY	CSR
2.60.120.180	3.2.1.8	2vg9A00	109	LEU	CSR
2.60.120.180	3.2.1.8	2vg9A00	137	TYR	CSR
2.60.120.180	3.2.1.8	2vg9A00	144	HIS	LBR
2.60.120.180	3.2.1.8	2vg9A00	158	GLN	CSR
2.60.120.180	3.2.1.8	2vg9A00	163	ARG	CSR
2.60.120.180	3.2.1.8	2vg9A00	177	HIS	CSR
2.60.120.180	3.2.1.8	2vg9A00	199	GLU	ASR
2.60.120.200	2.4.1.207	1umzB00	103	THR	CSR
2.60.120.200	2.4.1.207	1umzB00	120	TRP	CSR
2.60.120.200	2.4.1.207	1umzB00	123	PRO	CSR
2.60.120.200	2.4.1.207	1umzB00	167	MET	CSR
2.60.120.200	2.4.1.207	1umzB00	250	TYR	CSR
2.60.120.200	2.4.1.207	1umzB00	252	TYR	CSR
2.60.120.200	2.4.1.207	1umzB00	253	CYS	CSR
2.60.120.200	2.4.1.207	1umzB00	255	ASP	CSR
2.60.120.200	2.4.1.207	1umzB00	266	CYS	CSR
2.60.120.200	3.2.1.73	1mveA00	40	PHE	CSR
2.60.120.200	3.2.1.73	1mveA00	54	TRP	CSR
2.60.120.200	3.2.1.73	1mveA00	56	GLU	ASR
2.60.120.200	3.2.1.73	1mveA00	62	LEU	CSR
2.60.120.200	3.2.1.73	1mveA00	72	ASN	CSR
2.60.120.200	3.2.1.73	1mveA00	94	ALA	CSR
2.60.120.200	3.2.1.73	1mveA00	114	VAL	CSR
2.60.120.260	2.7.10.1	2bbaA00	61	CYS	CSR
2.60.120.260	2.7.10.1	2bbaA00	108	LYS	CSR
2.60.120.260	2.7.10.1	2bbaA00	109	GLU	CSR
2.60.120.260	2.7.10.1	2bbaA00	115	TYR	CSR
2.60.120.260	2.7.10.1	2bbaA00	137	LYS	CSR
2.60.120.260	2.7.10.1	2bbaA00	177	ALA	CSR
2.60.120.260	3.2.1.4	1uwwA00	29	GLY	CSR
2.60.120.260	3.2.1.4	1uwwA00	34	GLY	LBR
2.60.120.260	3.2.1.4	1uwwA00	37	GLY	CSR
2.60.120.260	3.2.1.4	1uwwA00	62	VAL	CSR
2.60.120.260	3.2.1.4	1uwwA00	68	TRP	LBR
2.60.120.260	3.2.1.4	1uwwA00	164	ARG	LBR
2.60.120.260	3.2.1.4	1uwwA00	178	ALA	CSR
2.60.120.260	3.2.1.4	1uwwA00	184	ASP	CSR
2.60.120.260	3.2.1.4	1uwwA00	185	ASN	CSR
2.60.120.260	3.2.1.4	1uwwA00	186	VAL	CSR
2.60.120.260	3.2.1.8	1gnyA00	99	MET	CSR
2.60.120.260	3.2.1.8	1gnyA00	100	ALA	CSR
2.60.120.260	3.2.1.8	1gnyA00	130	ASP	CSR
2.60.120.260	3.2.1.8	1gnyA00	133	GLY	CSR
2.60.120.260	3.2.1.8	1gnyA00	146	ASP	CSR
2.60.120.260	3.2.1.8	1gnyA00	149	ILE	CSR
2.60.120.260	3.2.1.8	1gnyA00	195	ASP	CSR
2.60.120.260	3.2.1.8	1gnyA00	233	LYS	CSR
2.60.120.260	3.2.1.8	1gnyA00	235	VAL	CSR
2.60.120.260	3.2.1.23	1jywA01	153	TRP	CSR
2.60.120.260	3.2.1.23	1jywA01	155	ASN	CSR
2.60.120.260	3.2.1.23	1jywA01	156	GLY	CSR
2.60.120.260	3.2.1.23	1jywA01	160	GLY	CSR
2.60.120.260	3.2.1.23	1jywA01	201	ASP	LBR
2.60.120.260	3.5.3.4	1o59A01	69	ASP	CSR
2.60.120.260	3.5.3.4	1o59A01	71	TRP	CSR
2.60.120.260	3.5.3.4	1o59A01	108	ASN	CSR
2.60.120.260	3.5.3.4	1o59A01	164	HIS	CSR
2.60.120.260	3.5.3.4	1o59A01	171	PRO	CSR
2.60.120.260	3.5.3.4	1o59A01	177	ARG	CSR
2.60.120.290	3.4.21.42	1nziB01	7	GLU	CSR
2.60.120.290	3.4.21.42	1nziB01	31	GLU	CSR
2.60.120.290	3.4.21.42	1nziB01	76	PRO	CSR
2.60.120.290	3.4.21.42	1nziB01	91	LEU	CSR
2.60.120.330	1.21.3.1	2bjsA00	104	CYS	LBR
2.60.120.330	1.21.3.1	2bjsA00	107	ASN	CSR
2.60.120.330	1.21.3.1	2bjsA00	121	THR	CSR
2.60.120.330	1.21.3.1	2bjsA00	132	GLU	CSR
2.60.120.330	1.21.3.1	2bjsA00	183	SER	LBR
2.60.120.330	1.21.3.1	2bjsA00	187	ILE	LBR
2.60.120.330	1.21.3.1	2bjsA00	195	TYR	CSR
2.60.120.330	1.21.3.1	2bjsA00	202	THR	CSR
2.60.120.330	1.21.3.1	2bjsA00	212	GLU	CSR
2.60.120.330	1.21.3.1	2bjsA00	235	THR	CSR
2.60.120.330	1.21.3.1	2bjsA00	250	LEU	CSR
2.60.120.330	1.21.3.1	2bjsA00	283	PRO	LBR
2.60.200.20	2.7.11.1	1g3gA00	70	ARG	CSR
2.60.200.20	2.7.11.1	1g3gA00	103	ASP	CSR
2.60.200.20	2.7.11.1	1g3gA00	107	ASN	CSR
2.60.200.20	2.7.11.1	1g3gA00	112	ASN	CSR
2.60.200.20	2.7.11.1	1g3gA00	124	LEU	CSR
2.70.40.10	3.5.4.13	1xs1F00	21	PRO	CSR
2.70.40.10	3.5.4.13	1xs1F00	95	GLU	CSR
2.70.40.10	3.5.4.13	1xs1F00	112	SER	LBR
2.70.40.10	3.5.4.13	1xs1F00	115	ARG	ASR
2.70.40.10	3.5.4.13	1xs1F00	123	THR	CSR
2.70.40.10	3.5.4.13	1xs1F00	131	TRP	LBR
2.70.40.10	3.5.4.13	1xs1F00	136	VAL	LBR
2.70.40.10	3.5.4.13	1xs1F00	138	GLU	ASR
2.70.40.10	3.5.4.13	1xs1F00	174	ARG	LBR
2.70.40.10	3.5.4.13	1xs1F00	179	TYR	CSR
2.70.40.10	3.6.1.23	1slhB00	66	GLY	ASR
2.70.40.10	3.6.1.23	1slhB00	74	SER	ASR
2.70.40.10	3.6.1.23	1slhB00	77	ASN	LBR
2.70.40.10	3.6.1.23	1slhB00	81	THR	ASR
2.70.40.10	3.6.1.23	1slhB00	85	GLY	ASR
2.70.40.10	3.6.1.23	1slhB00	86	TYR	LBR
2.70.40.10	3.6.1.23	1slhB00	91	LYS	LBR
2.70.40.10	3.6.1.23	1slhB00	110	ARG	ASR
2.70.98.10	3.2.1.23	1jz7D05	787	ALA	CSR
2.70.98.10	3.2.1.23	1jz7D05	790	ASP	CSR
2.70.98.10	3.2.1.23	1jz7D05	791	ASN	CSR
2.70.98.10	3.2.1.23	1jz7D05	792	ASP	CSR
2.70.98.10	3.2.1.23	1jz7D05	883	GLY	CSR
2.70.98.10	3.2.1.23	1jz7D05	902	PRO	CSR
2.70.98.10	3.2.1.23	1jz7D05	908	ASP	CSR
2.70.98.10	3.2.1.23	1jz7D05	929	TYR	CSR
2.70.98.10	3.2.1.23	1jz7D05	932	PRO	CSR
[truncated: 7,456 more rows]
